# Supplementary material
Source: publisher figshare collection journal article supplement (https://acs.figshare.com/ndownloader/files/4385542)

# 4-Formylaminooxyvinylglycine, an Herbicidal Germination-Arrest Factor (GAF) from *Pseudomonas* Rhizosphere Bacteria.

Kerry L. McPhail,<sup>†,\*</sup> Donald J. Armstrong,<sup>‡</sup> Mark D. Azevedo,<sup>§</sup> Gary M. Banowetz<sup>§</sup> and Dallice I.  
Mills<sup>‡</sup>

*College of Pharmacy, 203 Pharmacy Building, Oregon State University, Corvallis, OR 97331,*  
*Department of Botany and Plant Pathology, Oregon State University, Corvallis, OR 97331, USDA-ARS*  
*NFSPRC National Forage Seed Production Research Center, Corvallis, OR 97331*

## RECEIVED DATE

\* To whom correspondence should be addressed. Tel: 541 737 5808. Fax: 541 737 3999. Email:  
[kerry.mcphail@oregonstate.edu](mailto:kerry.mcphail@oregonstate.edu)

<sup>†</sup> College of Pharmacy, Oregon State University

<sup>‡</sup> Department of Botany and Plant Pathology, Oregon State University

<sup>§</sup> USDA-ARS NFSPRC

## Table of Contents

- S1. Figure S1. Sephadex<sup>®</sup> G15 column elution profiles of Fe<sup>2+</sup> and Cu<sup>2+</sup> binding activity.
- S1-2. Detailed experimental for amino acid oxidase (absolute configuration) experiments.
- S2. Figure S2. TLC plates for amino acid oxidase (absolute configuration) experiments.
- S3. <sup>1</sup>H NMR Spectrum for 4-formylaminovinylglycine (GAF, **1**)
- S4. <sup>13</sup>C NMR Spectrum for 4-formylaminovinylglycine (GAF, **1**)
- S5. <sup>1</sup>H-<sup>1</sup>H COSY Spectrum for 4-formylaminovinylglycine (GAF, **1**)
- S6. HSQC Spectrum for 4-formylaminovinylglycine (GAF, **1**)
- S7. HMBC Spectrum (d6 = 65 ms) for 4-formylaminovinylglycine (GAF, **1**)
- S8. HMBC Spectrum (d6 = 125 ms) for 4-formylaminovinylglycine (GAF, **1**)
- S9. HMBC Spectrum (d6 = 40 ms) for 4-formylaminovinylglycine (GAF, **1**)
- S10. Selective 1D NOESY Spectra (d8 = 500 ms) for 4-formylaminovinylglycine (GAF, **1**)
- S11. Low resolution ESI-MS for 4-formylaminovinylglycine (GAF, **1**)
- S12. Low resolution ESI-MS<sup>2</sup> of *m/z* 183 [M+Na]<sup>+</sup> for 4-formylaminovinylglycine (GAF, **1**)
- S13-14. Table. Taxonomy and Source of *P. fluorescens* Isolates in the USDA-ARS Collection.
- S15. Silica and cellulose TLC plates for the field-collected and laboratory strains of *P. fluorescens*.
- S16. Silica and cellulose TLC plates for twenty additional field-collected *P. fluorescens* isolates.
- S17-23. <sup>1</sup>H capNMR spectra for field-collected and laboratory strains of *P. fluorescens*.

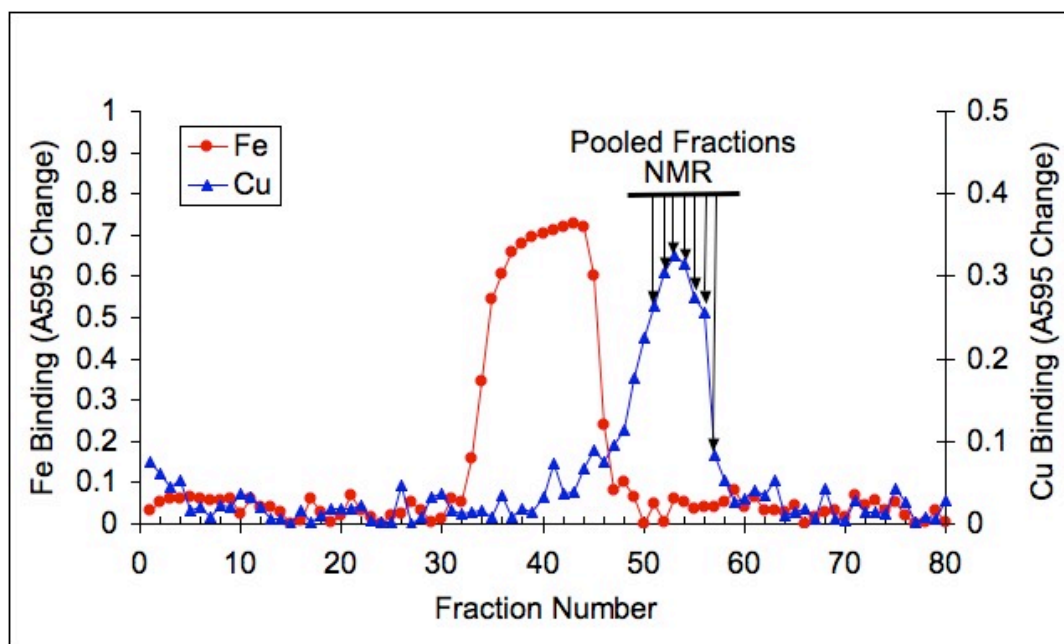

**Figure S1.** Sephadex® G15 column elution profiles of  $\text{Fe}^{2+}$  and  $\text{Cu}^{2+}$  binding activity as measured with the corresponding ChromeAzuroil S reagent. For graphical purposes, the changes in absorbance were calculated by subtracting the measured absorbance in each well from the highest well absorbance measured on a given plate. These values are plotted as  $\Delta A_{595}$ .

#### **Absolute configuration of GAF (1).**

##### **Experiments using L-amino acid oxidase (Sigma A9378-5MG, Type IV from *Crotalus atrox*):**

The 90% EtOH extract of 330 mL WH6 culture filtrate was resuspended in 33 mL  $\text{H}_2\text{O}$  ( $\sim 10 \mu\text{M}$ ), adjusted to pH 6.8 with NaOH, and distributed in 8 mL aliquots to each of four 25 mL Wheaton bottles (1-4 above). To each bottle was also added 80 units (in 0.9 mL) of commercial bovine liver catalase (Sigma C3155-50MG). To verify AAO enzyme activity, L-Phe (1 mL of 1 mM solution in  $\text{H}_2\text{O}$ ) was added to bottles 3 and 4, concurrently with 1 mL  $\text{H}_2\text{O}$  to bottles 1 and 2. Finally, commercial L-AAO stock solution (3.8 units in 0.1 mL) was added to bottles 1 and 3; bottles 2 and 4 were supplemented with 0.1 mL  $\text{H}_2\text{O}$ , for final sample volume of 10 mL in each case. The samples were incubated at  $35^\circ\text{C}$  for 30 h, after which the enzymes were precipitated by centrifugation (2 h at  $4,000 \times g$ ) using Pall Life Sciences Macrosep Centrifugal Devices (10,000 MWCO, 15 mL size) that had been primed beforehand by centrifuging for 1 h with 12 mL  $\text{H}_2\text{O}$ . Each sample filtrate was concentrated in vacuo and redissolved in 76% EtOH at 32X concentration for TLC analysis on Analtech Microcrystalline Cellulose (EtOAc- $\text{PrOH}^i$ - $\text{H}_2\text{O}$  3:6:4) and Analtech GHL Silica (EtOAc- $\text{PrOH}^i$ -MeOH- $\text{H}_2\text{O}$  5:5:18:2) plates.

### Experiments using D-amino acid oxidase (Sigma A5222-100UN, from porcine kidney):

The 90% EtOH extract of 360 mL WH6 culture filtrate was resuspended in 36 mL H<sub>2</sub>O (~ 10 µM), adjusted to pH 8.5 with NaOH, and distributed in 8 mL aliquots to each of four 25 mL Wheaton bottles (1-4 above). To each bottle was added 380 units (in 0.5 mL) of commercial bovine liver catalase. To verify AAO enzyme activity, D-Ala (1 mL of 1 mM solution in H<sub>2</sub>O) was added to bottles 3 and 4, concurrently with 1 mL H<sub>2</sub>O to bottles 1 and 2. Finally, commercial D-AAO (3.8 units in 0.5 mL) was added to bottles 1 and 3, while bottles 2 and 4 were supplemented with 0.5 mL H<sub>2</sub>O, for final sample volume of 10 mL in each case. The samples were incubated at 35°C for 30 h, after which the enzymes were precipitated by centrifugation (2 hours at 4,000 x g) as described above. Each sample filtrate was analyzed by TLC as described above.

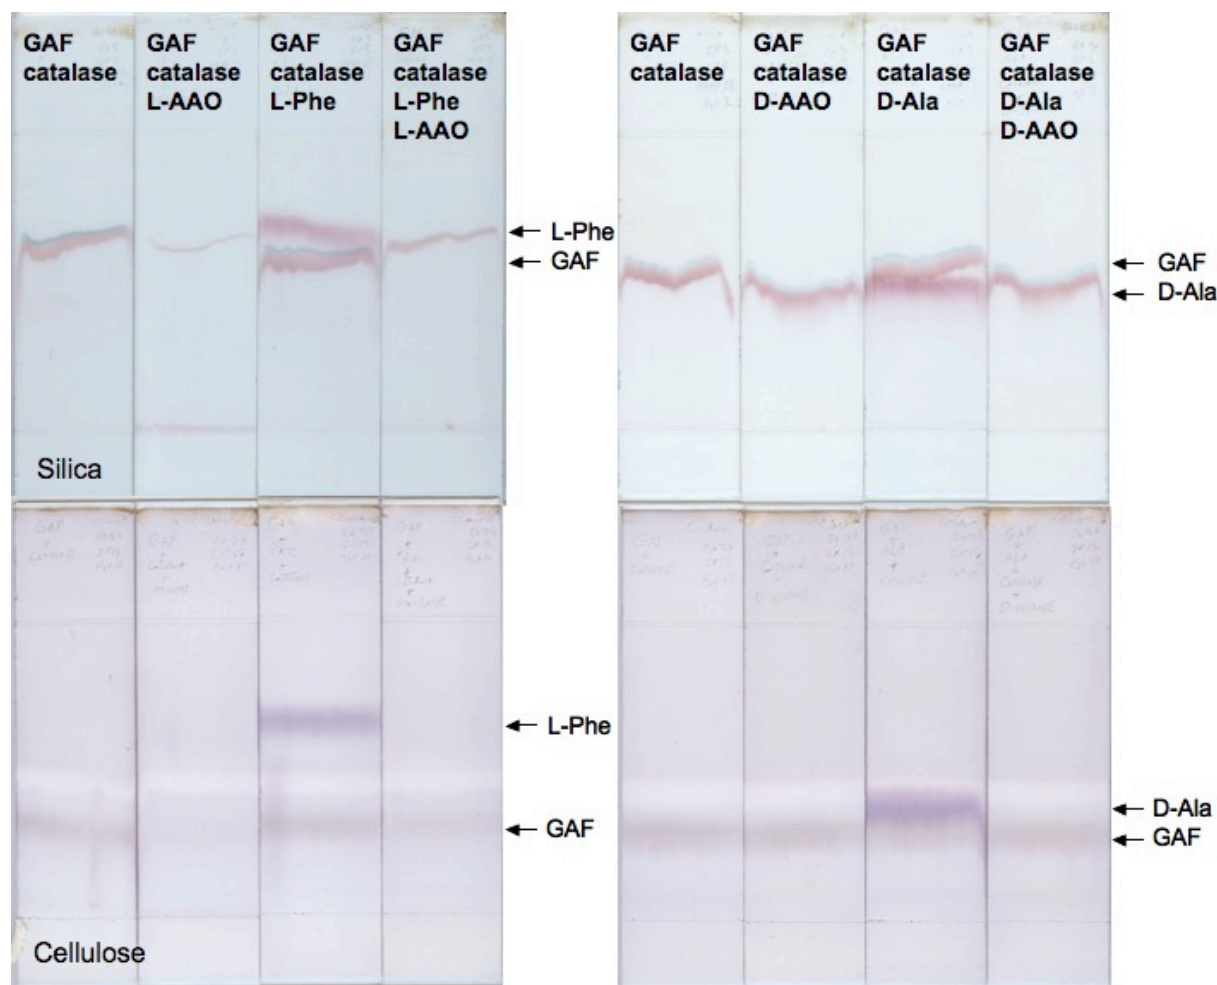

**Figure S2.** Silica (EtOAc-*i*PrOH-H<sub>2</sub>O 3:6:4) and cellulose (EtOAc-*i*PrOH-MeOH-H<sub>2</sub>O 5:5:18:2) TLC plates for GAF-containing WH6 extract treated with L- and D-amino acid oxidase.

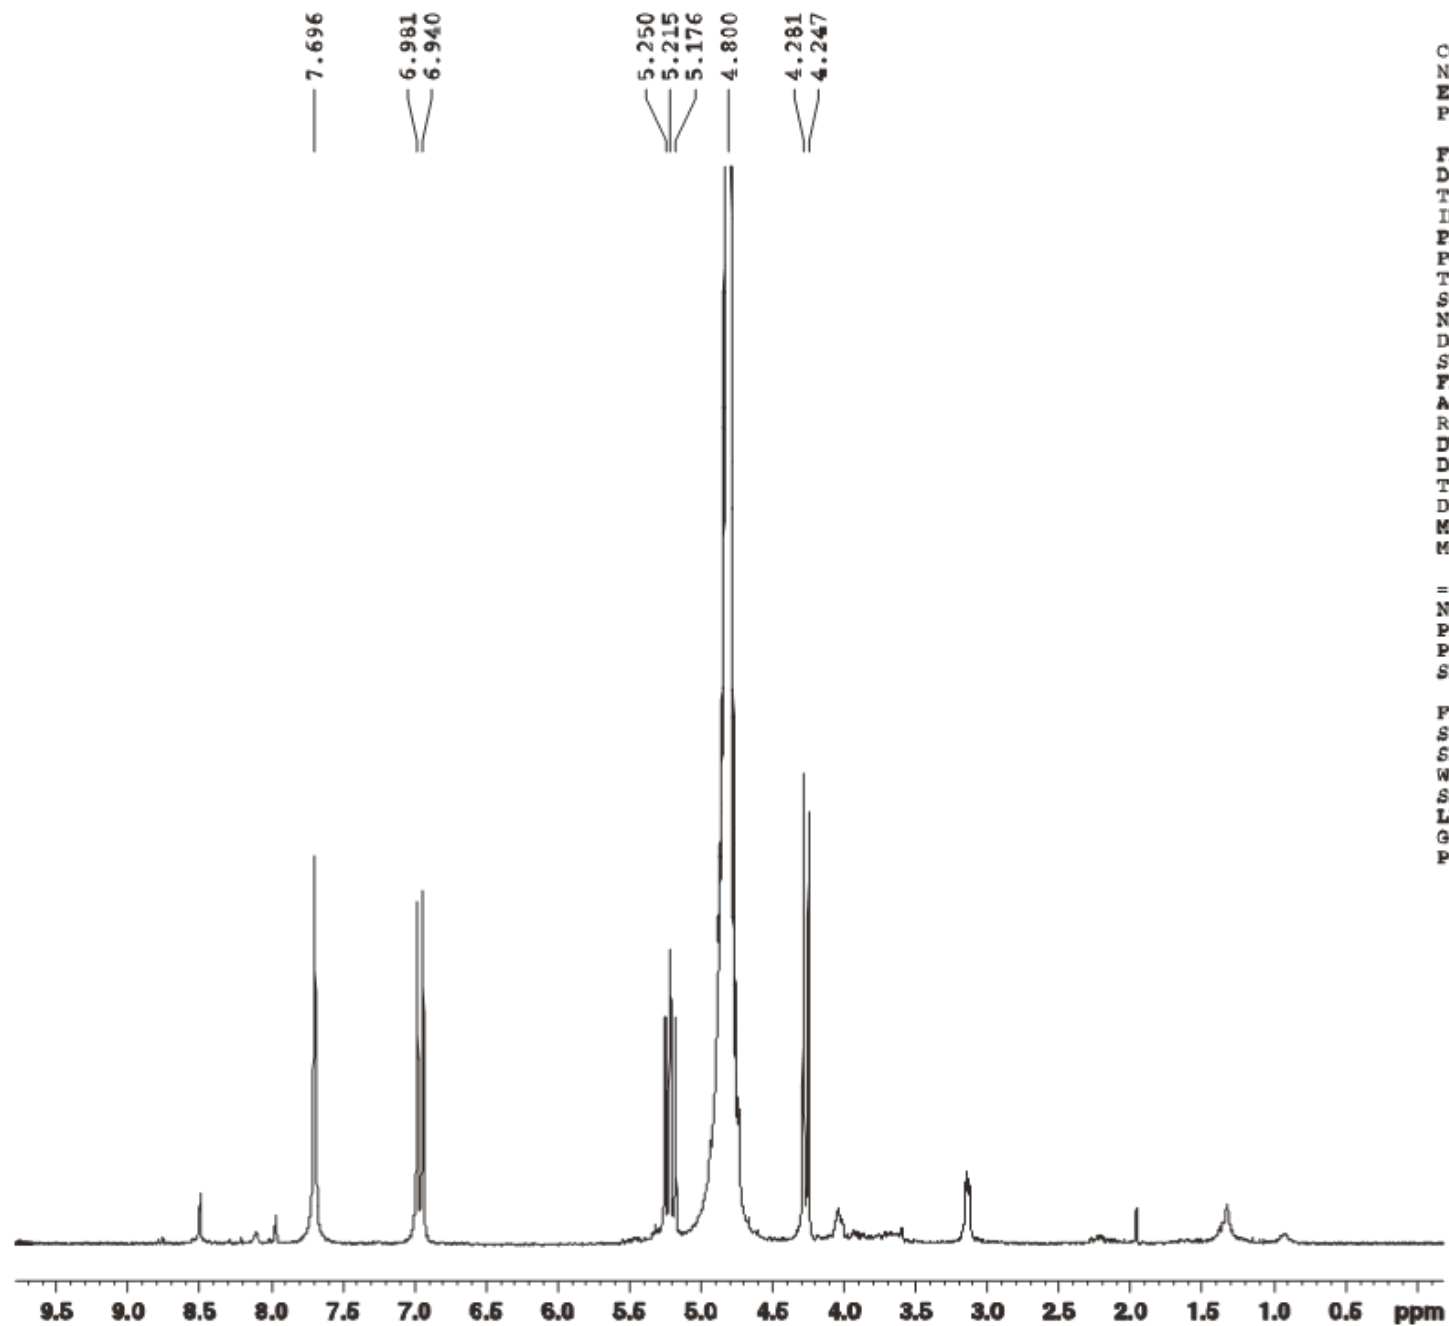

Current Data Parameters  
NAME DAIV1921\_GAF  
EXFNO 1  
PROCNO 1

F2 - Acquisition Parameters  
Date\_ 20050914  
Time 17.49  
INSTRUM spect  
PROBHD 5 mm BBO BB/2H  
PULPROG zg30  
TD 65536  
SOLVENT D2O  
NS 135  
DS 4  
SWH 6009.615 Hz  
FIDRES 0.091699 Hz  
AQ 5.4526453 sec  
RG 574.7  
DW 83.200 usec  
DE 158.64 usec  
TE 298.0 K  
D1 1.60000002 sec  
MCREST 0.00000000 sec  
MCWRK 0.01500000 sec

===== CHANNEL f1 =====  
NUC1 1H  
P1 11.00 usec  
PL1 0.00 dB  
SFO1 300.1324010 MHz

F2 - Processing parameters  
SI 32768  
SF 300.1299686 MHz  
WDW EM  
SSB 0  
LB 0.30 Hz  
GB 0  
PC 1.00

S3. <sup>1</sup>H NMR Spectrum for 4-formylaminovinylglycine (GAF, 1)

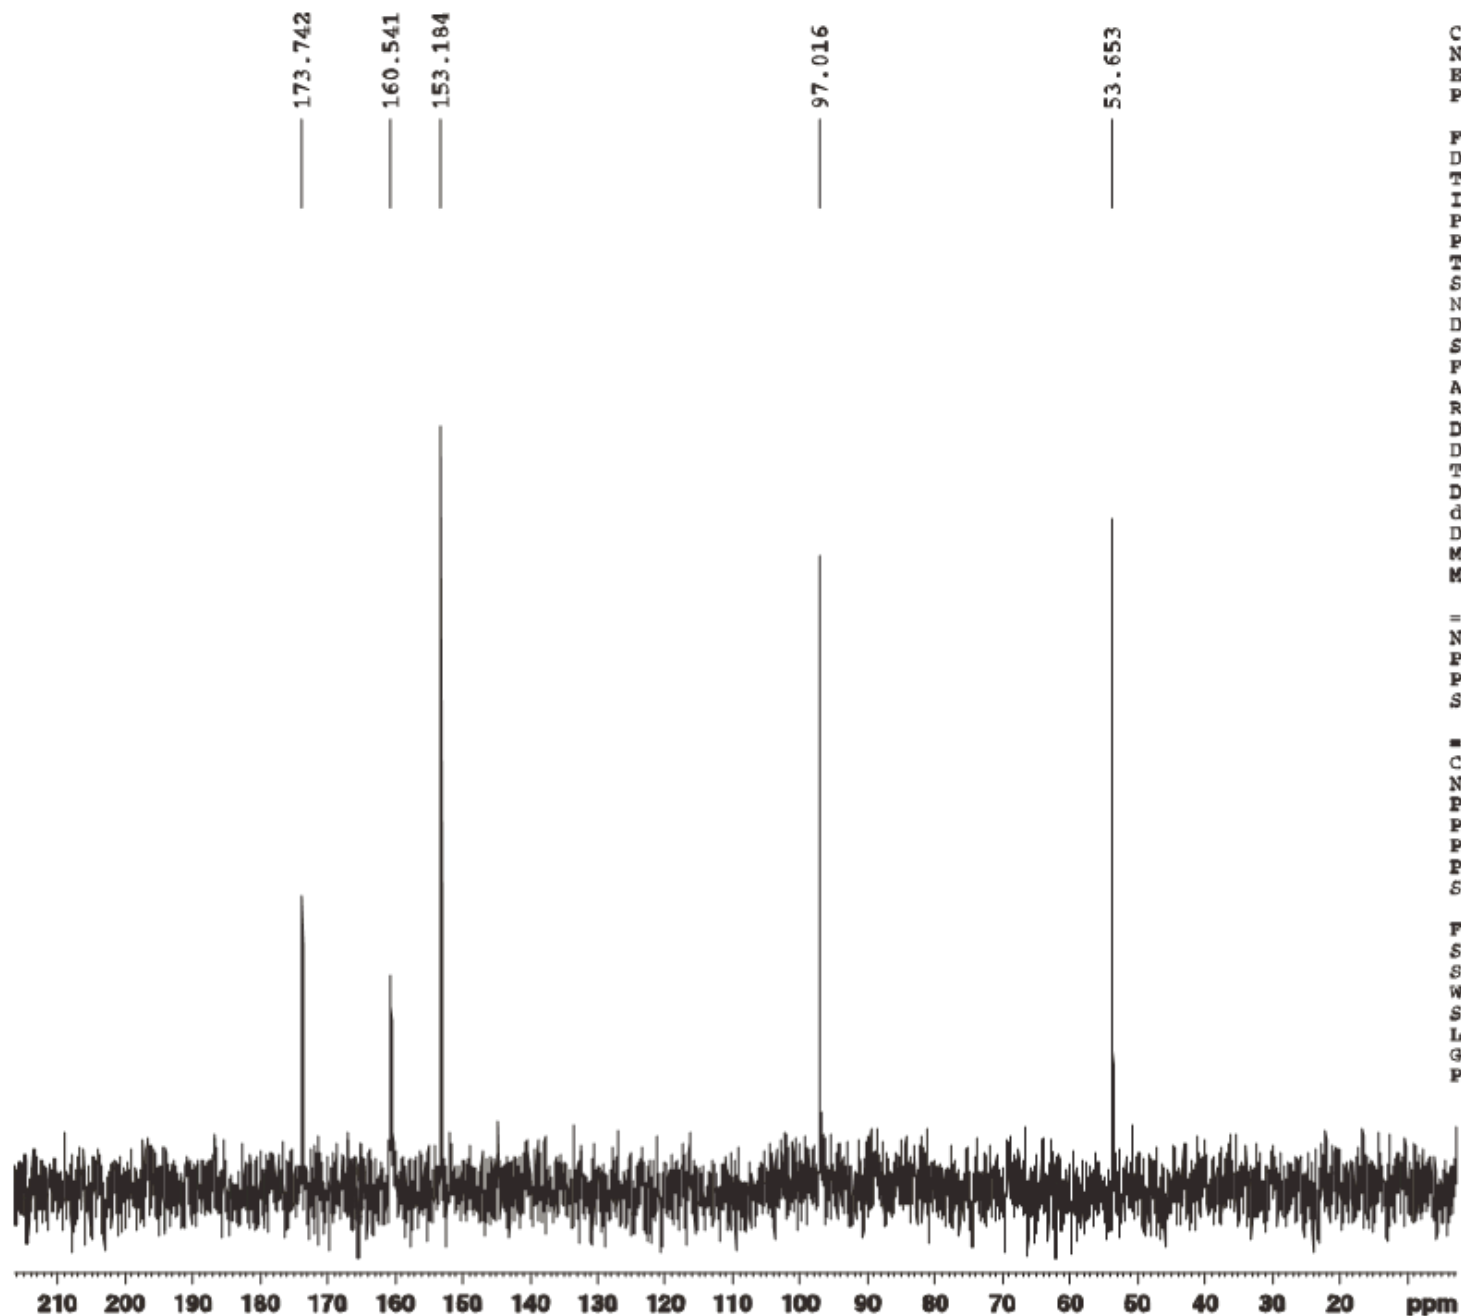

```

Current Data Parameters
NAME      DAIV1921_GAF
EXPNO     5
PROCNO    1

F2 - Acquisition Parameters
Date_     20050915
Time      10.49
INSTRUM   spect
PROBHD    5 mm BBO BB/2H
PULPROG   zgpg30
TD        65536
SOLVENT   CDCl3
NS        16480
DS        8
SWE       25641.025 Hz
FIDRES    0.391251 Hz
AQ        1.2780020 sec
RG        5160.6
DW        19.500 usec
DE        6.00 usec
TE        298.1 K
D1        0.30000001 sec
d11       0.03000000 sec
DELTA     0.20000002 sec
MCREST    0.00000000 sec
MCWRK     0.01500000 sec

===== CHANNEL f1 =====
NUC1      13C
P1        8.95 usec
PL1       0.00 dB
SFO1      75.4798238 MHz

===== CHANNEL f2 =====
CPDPRG2   waltz16
NUC2      1H
PCPD2     85.00 usec
PL2       0.00 dB
PL12      19.00 dB
PL13      19.00 dB
SFO2      300.1312005 MHz

F2 - Processing parameters
SI        32768
SF        75.4677490 MHz
WDW       EM
SSB       0
LB        3.00 Hz
GB        0
PC        1.40

```

S4.  $^{13}\text{C}$  NMR Spectrum for 4-formylaminovinylglycine (GAF, 1)

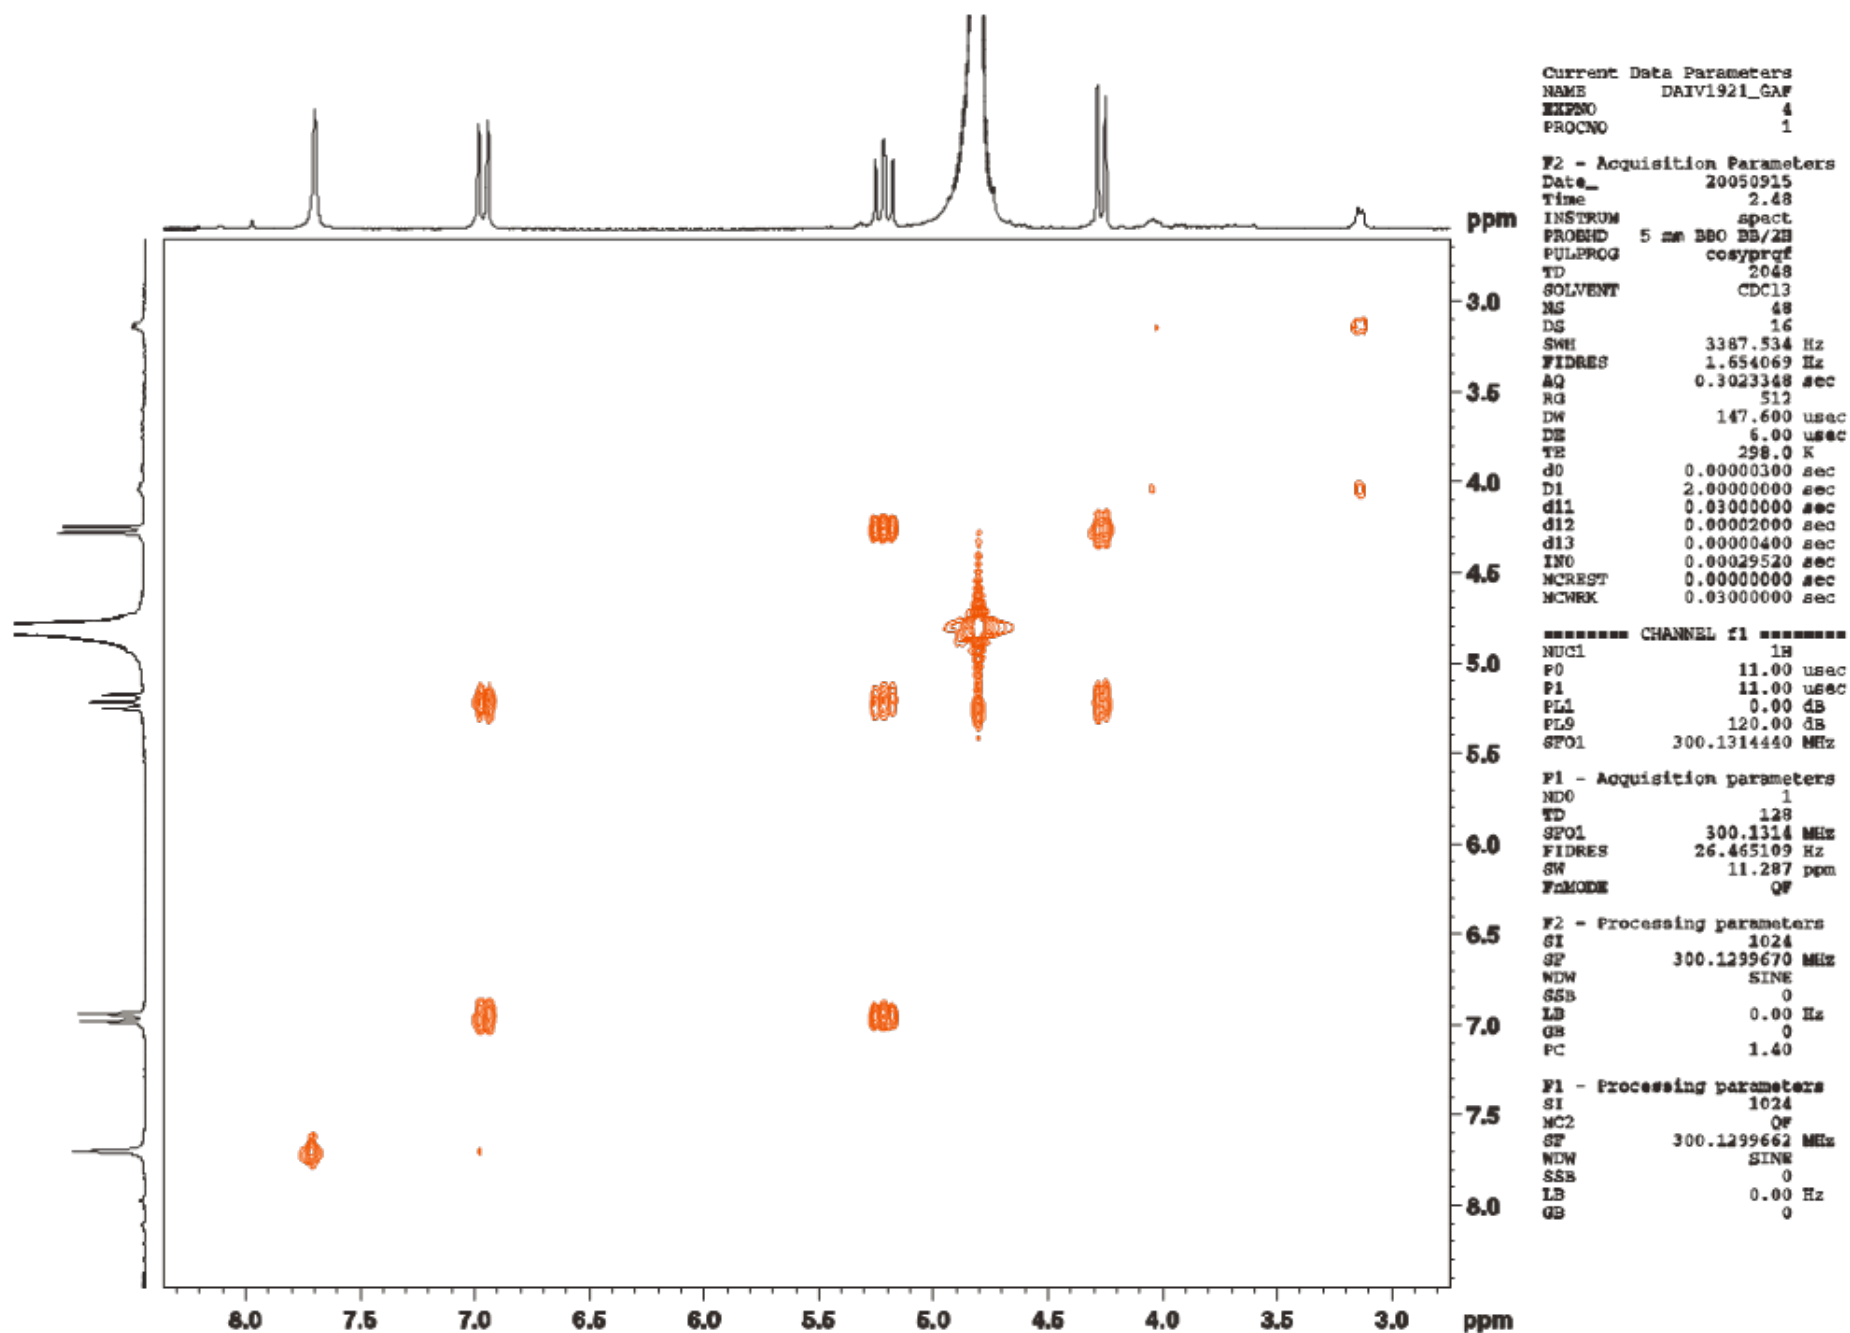

S5.  $^1\text{H}$ - $^1\text{H}$  COSY Spectrum for 4-formylaminovinylglycine (GAF, 1)

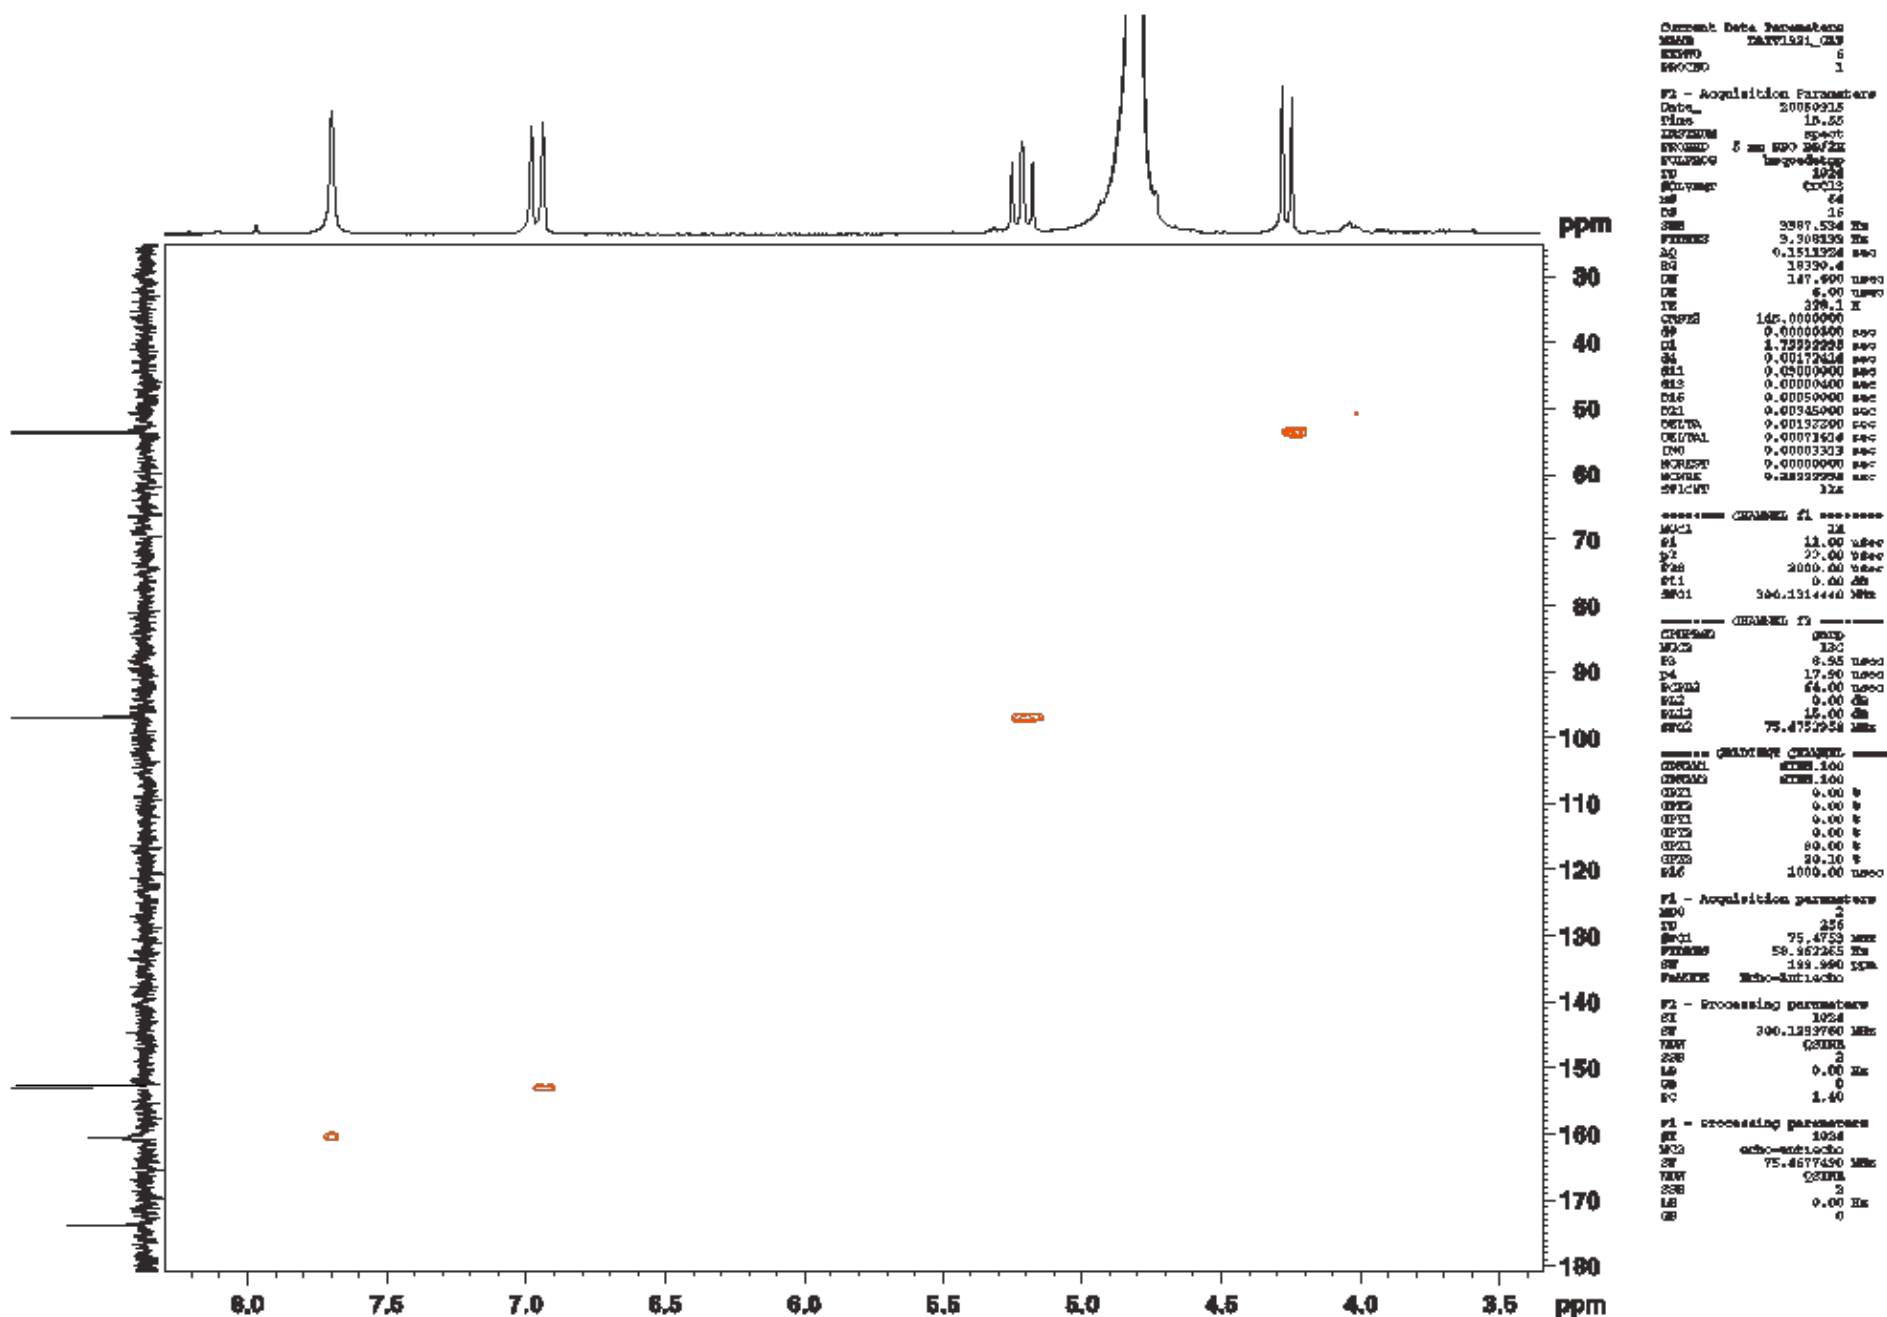

S6. HSQC Spectrum for 4-formylaminovinylglycine (GAF, 1)



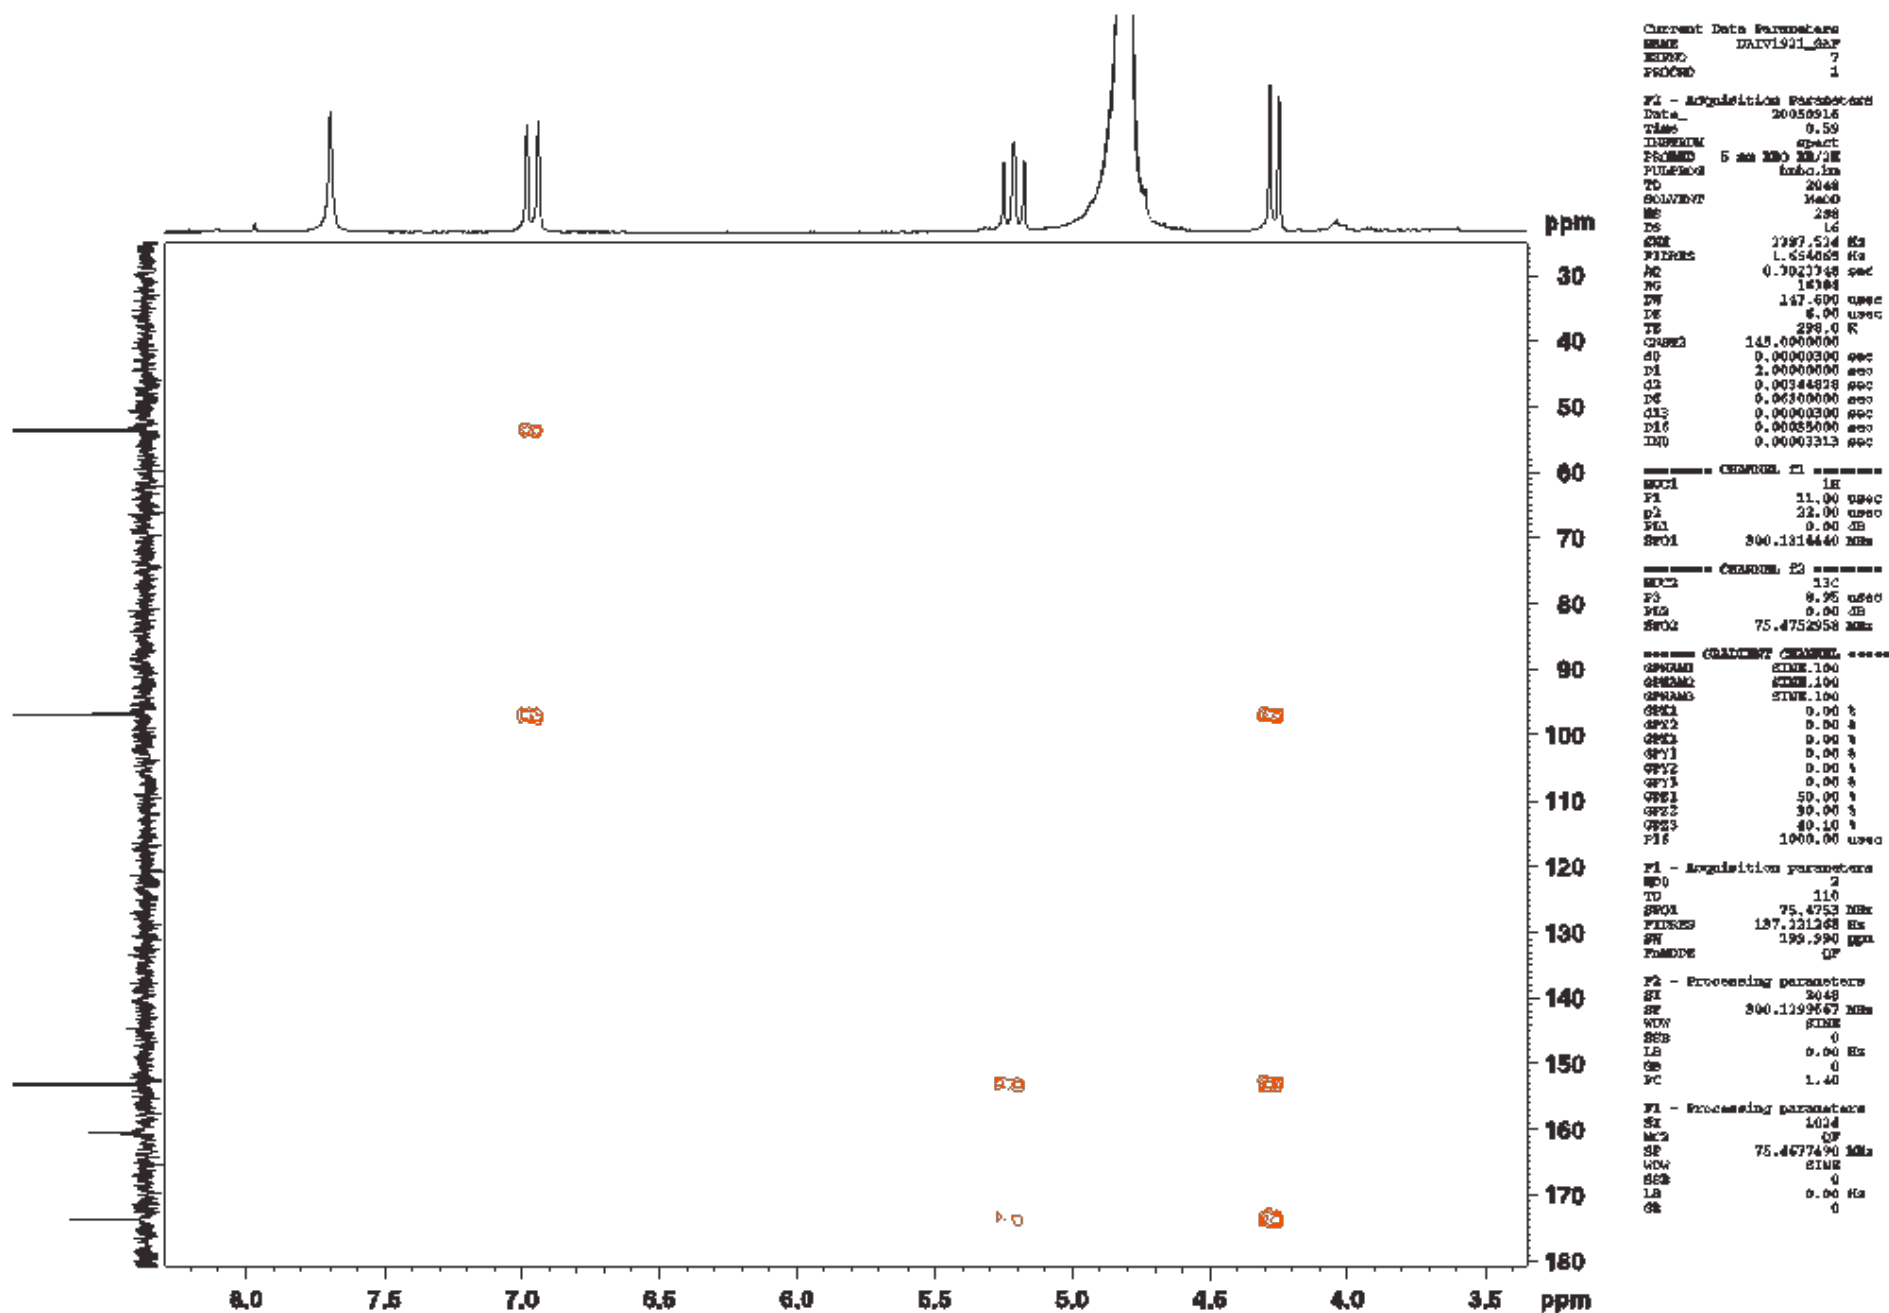

S7. HMBC Spectrum (d6 = 65 ms) for 4-formylaminovinyglycine (GAF, 1)

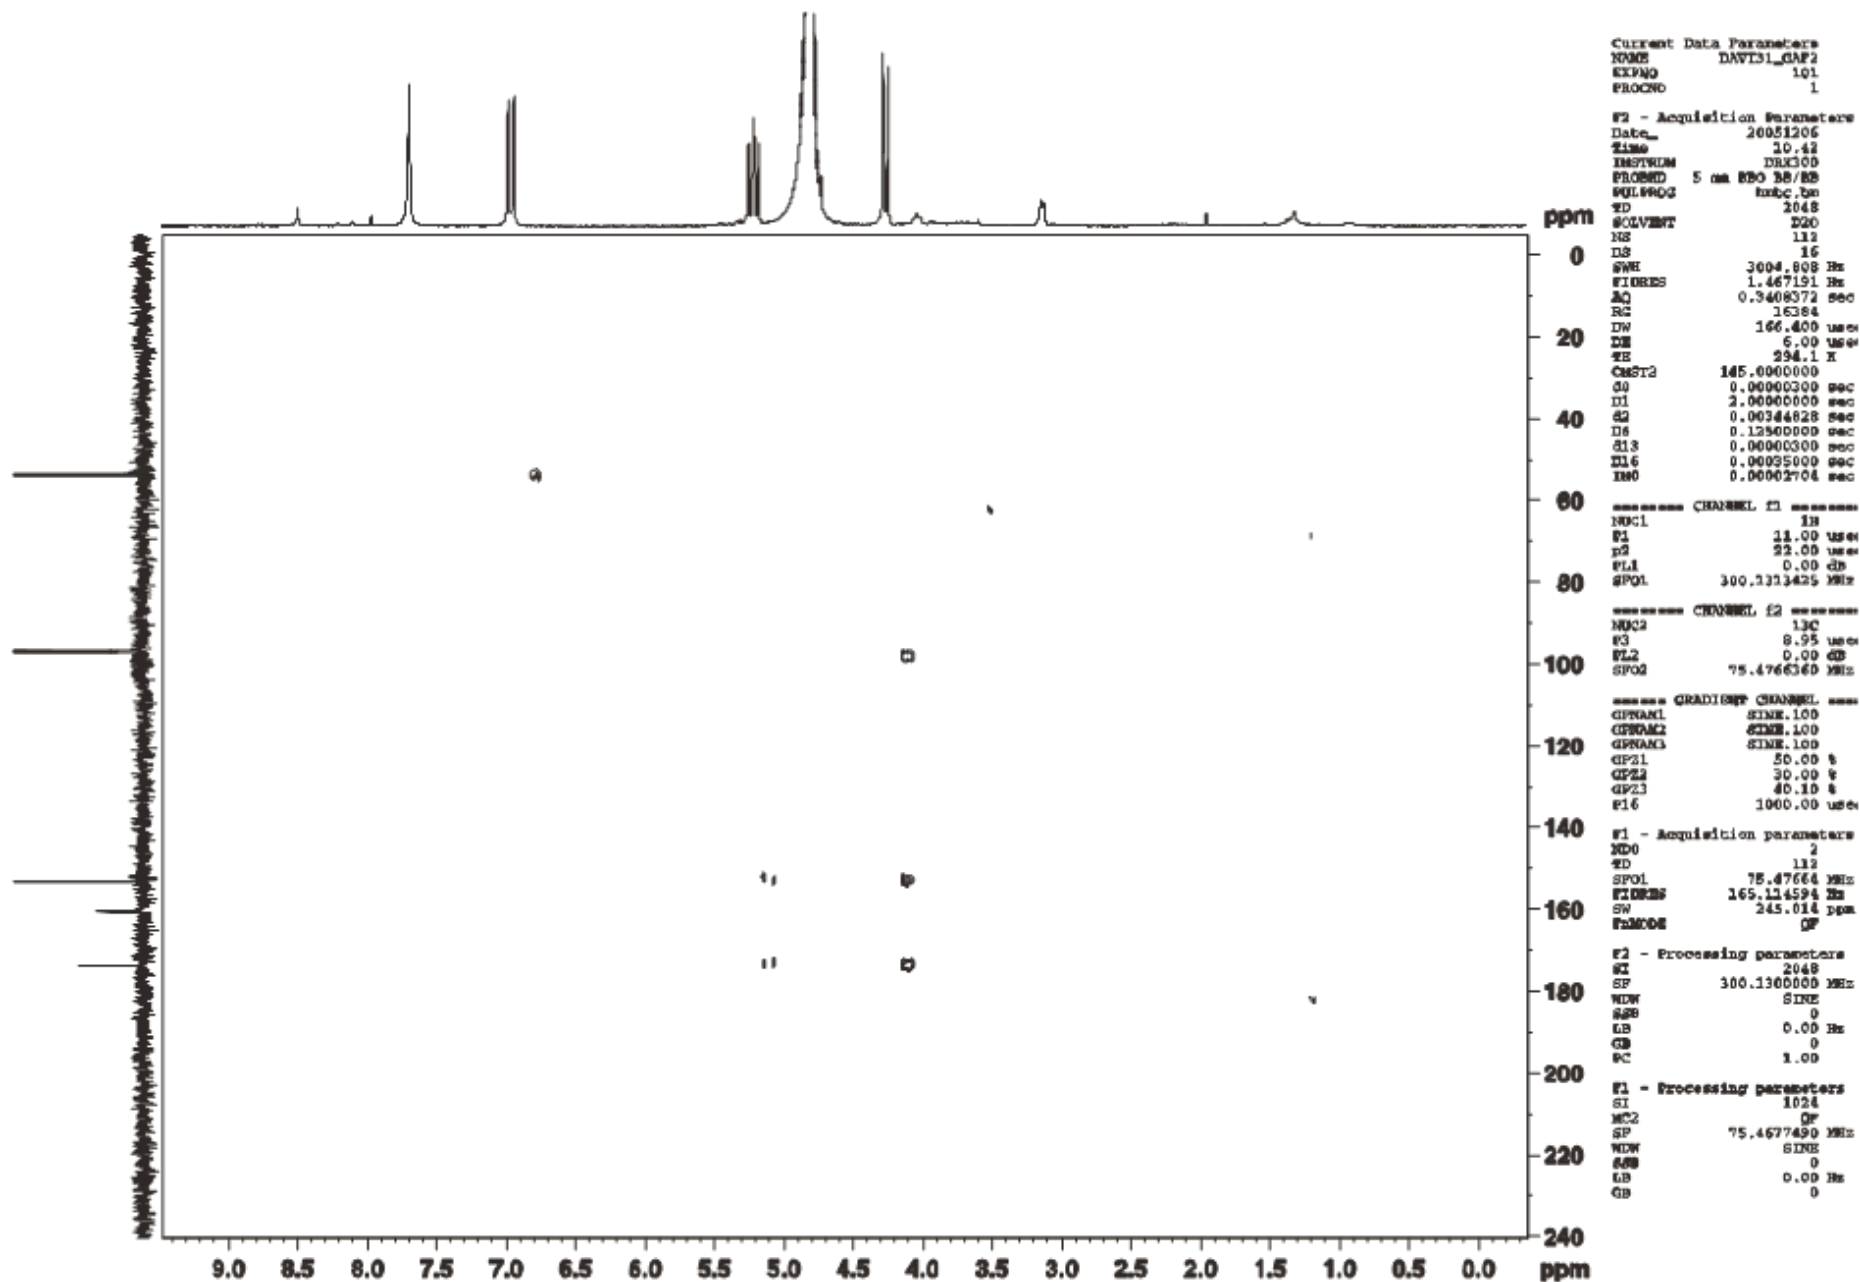

S8. HMBC Spectrum (d6 = 125 ms) for 4-formylaminovinyglycine (GAF, 1)

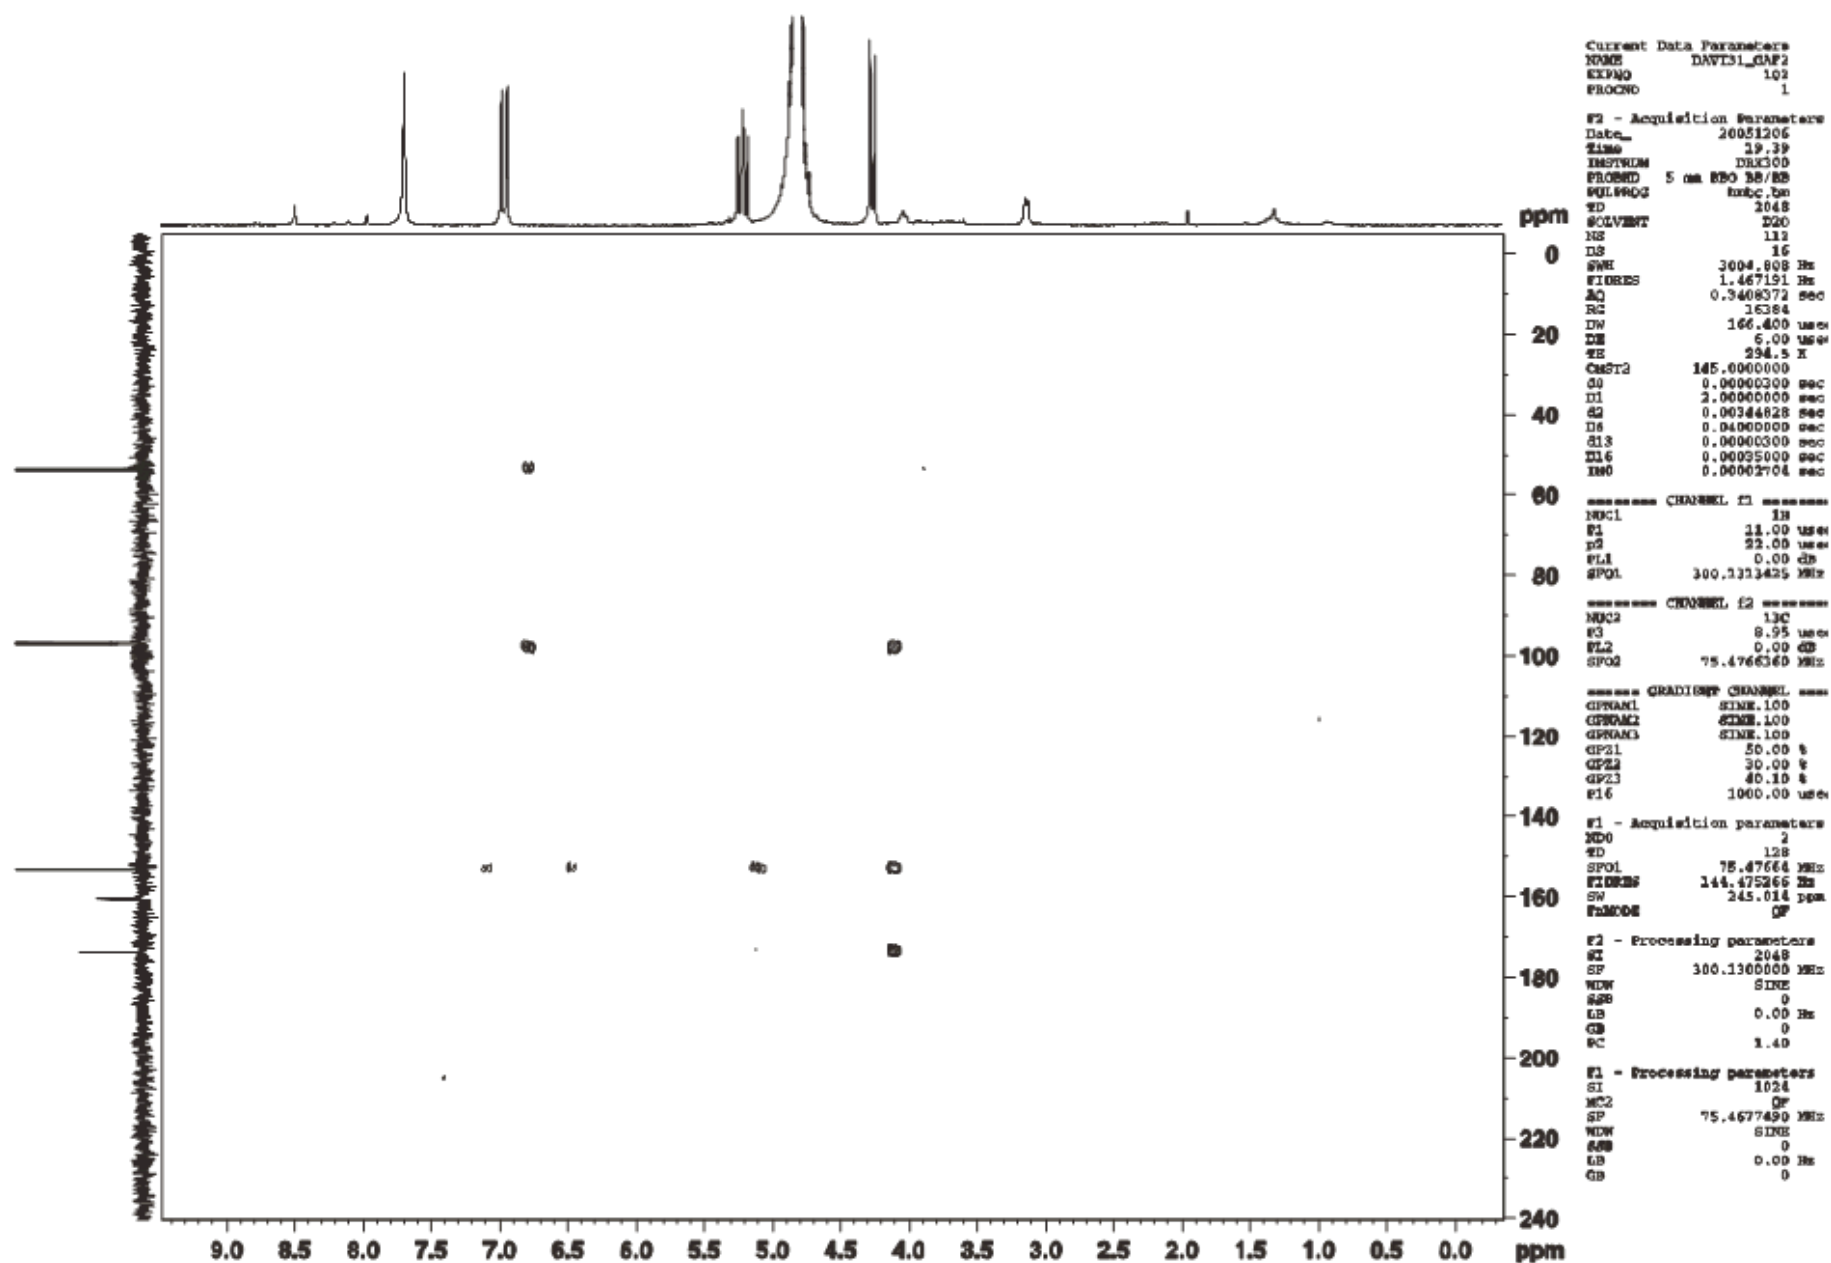

S9. HMBC Spectrum (d6 = 40 ms) for 4-formylaminovinyglycine (GAF, 1)

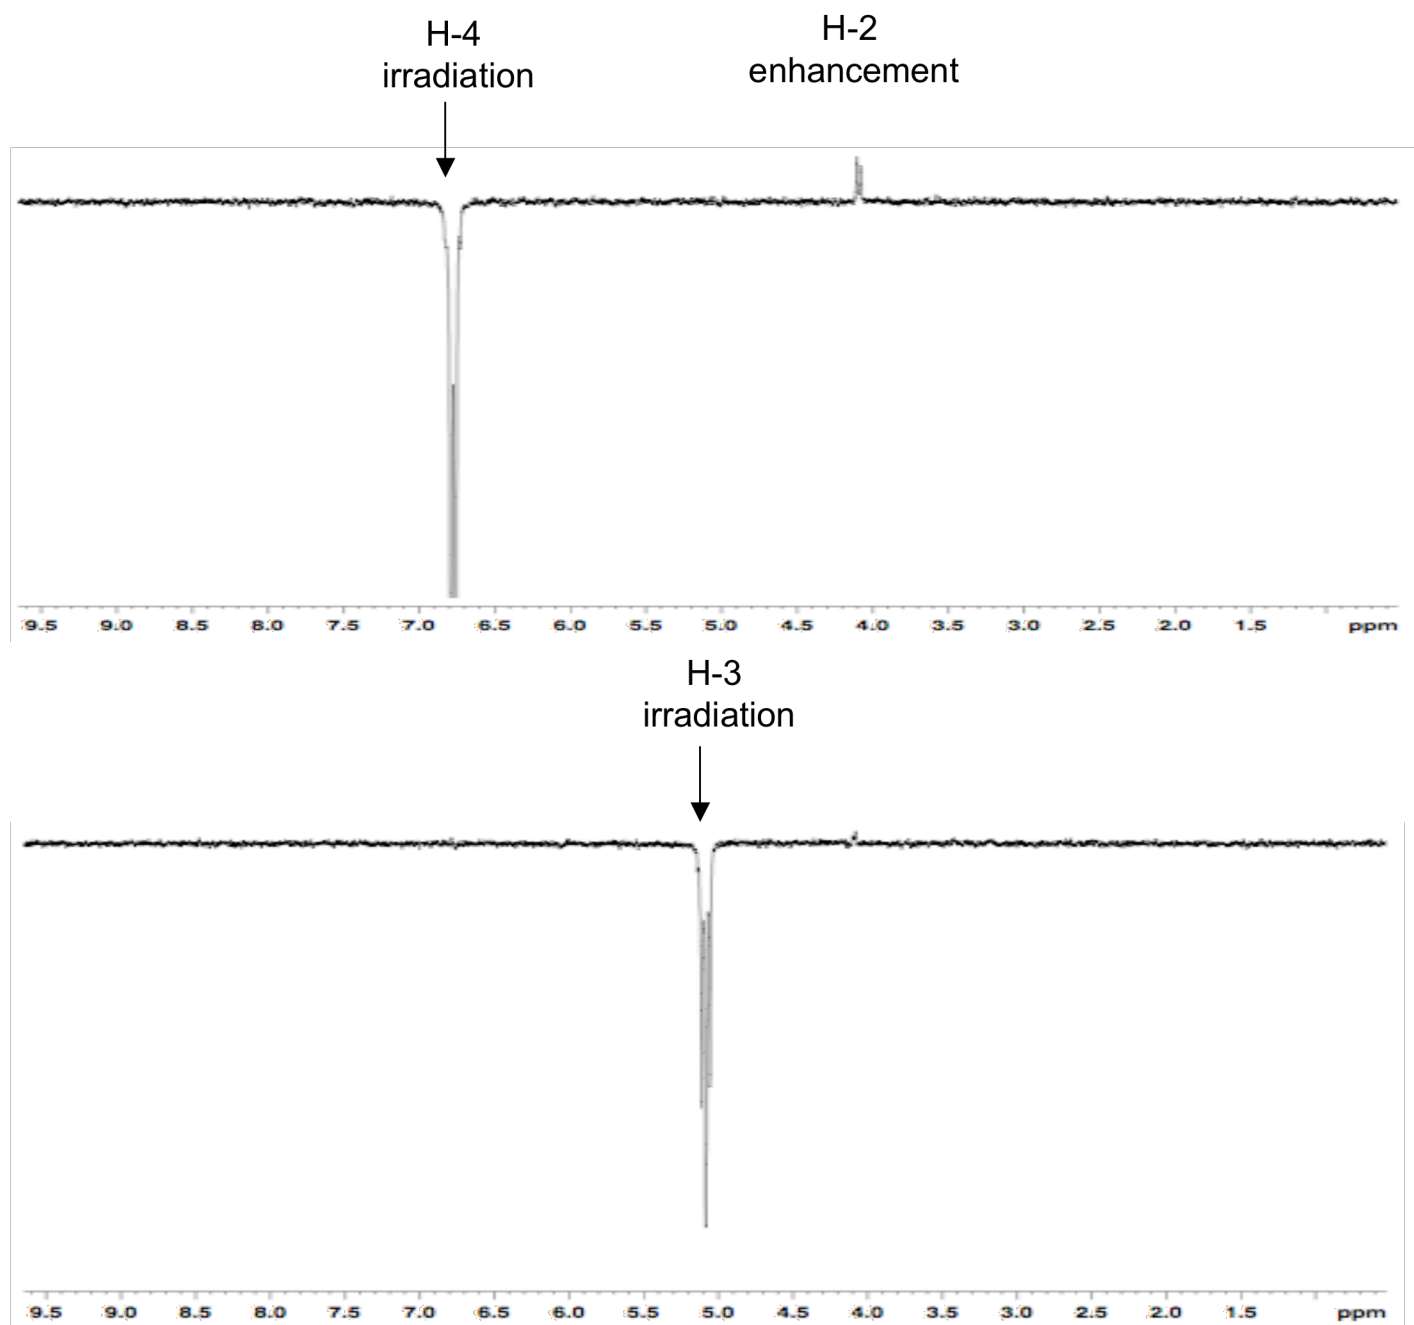

S10. Selective 1D NOESY Spectra (d8 = 500 ms) for 4-formylaminovinylglycine (GAF, **1**)

UnModGaf2 #65-90 RT: 1.03-1.43 AV: 26 NL: 2.16E7  
T: + c Full ms [90.00-1000.00]

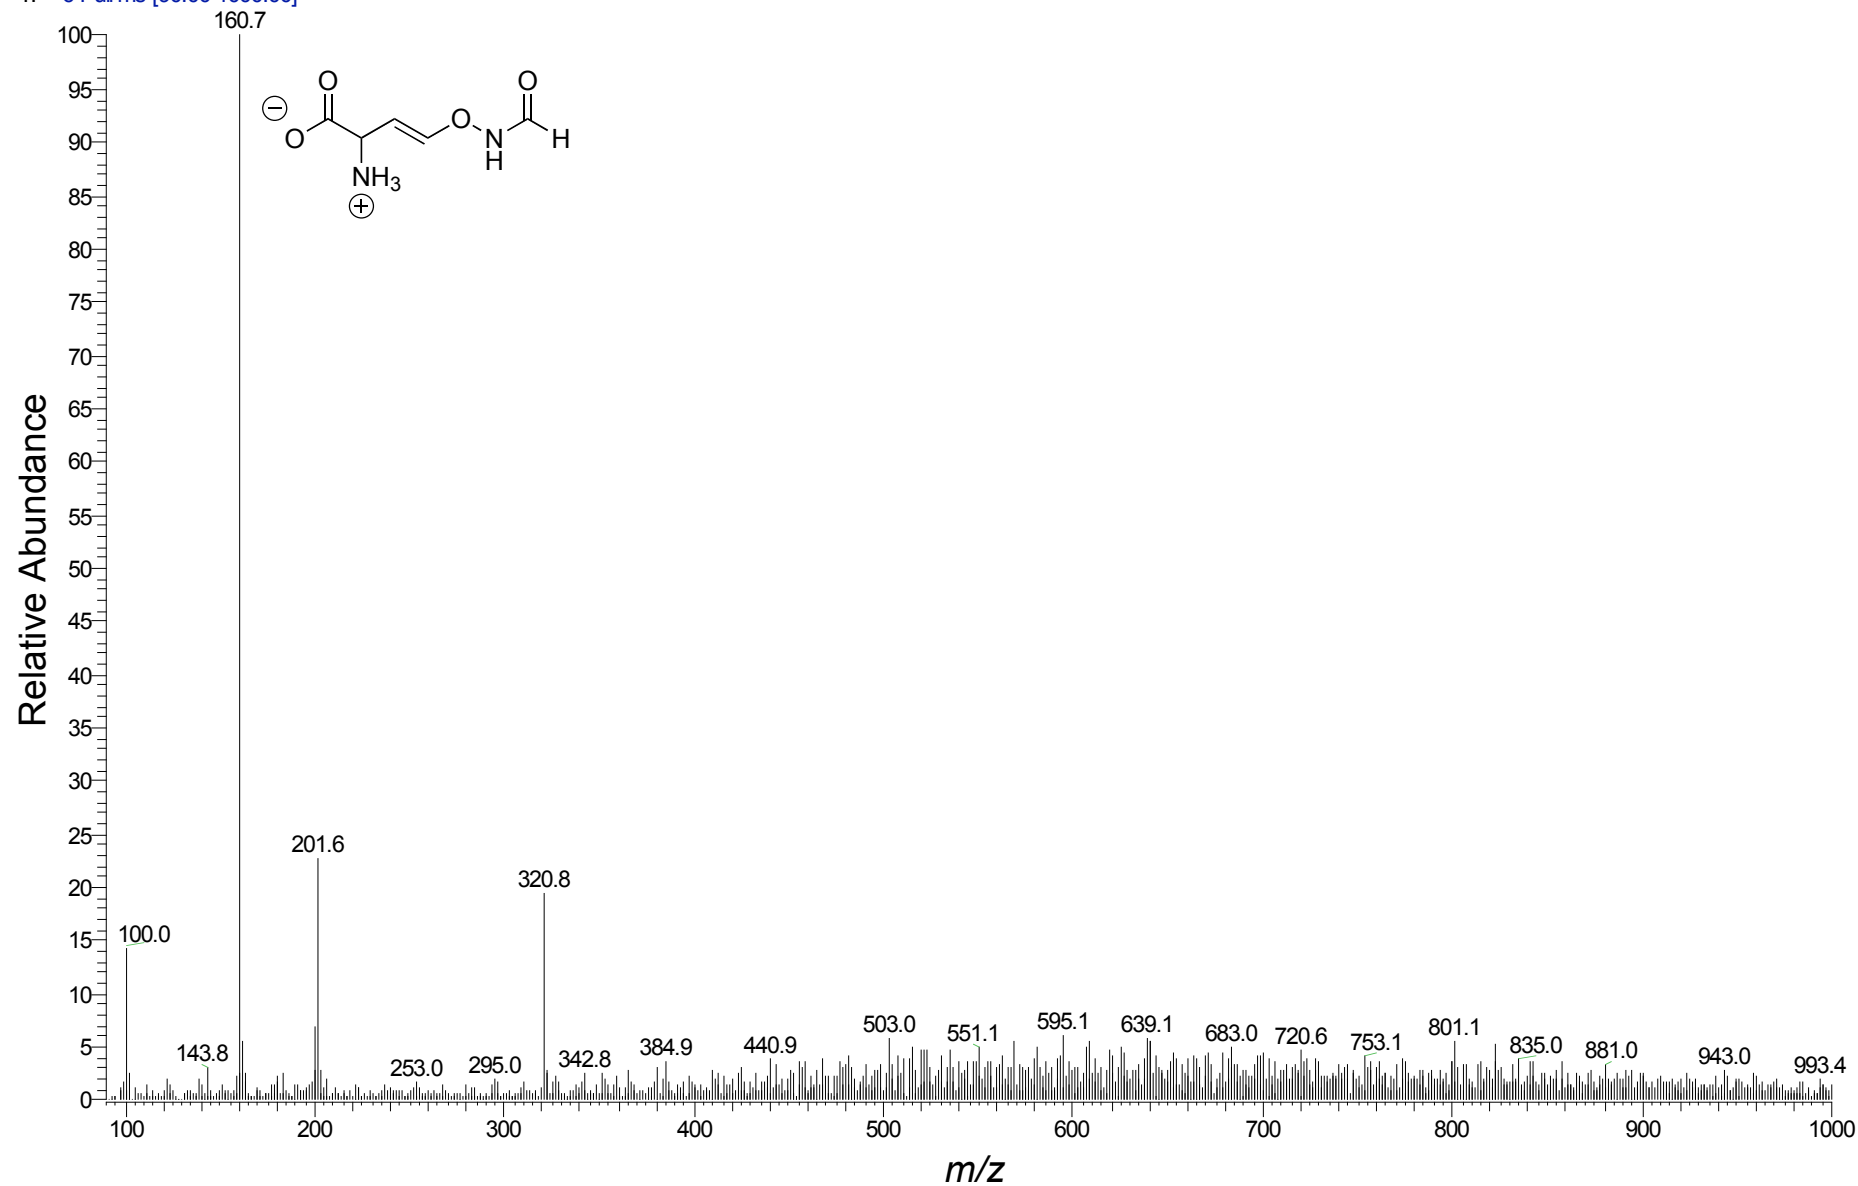

S11. Low resolution ESI-MS for 4-formylaminovinyglycine (GAF, 1)

Umga183 #79-92 RT: 0.61-0.75 AV: 14 NL: 1.30E6  
T: + c Full ms2 183.00@33.00 [ 50.00-200.00]

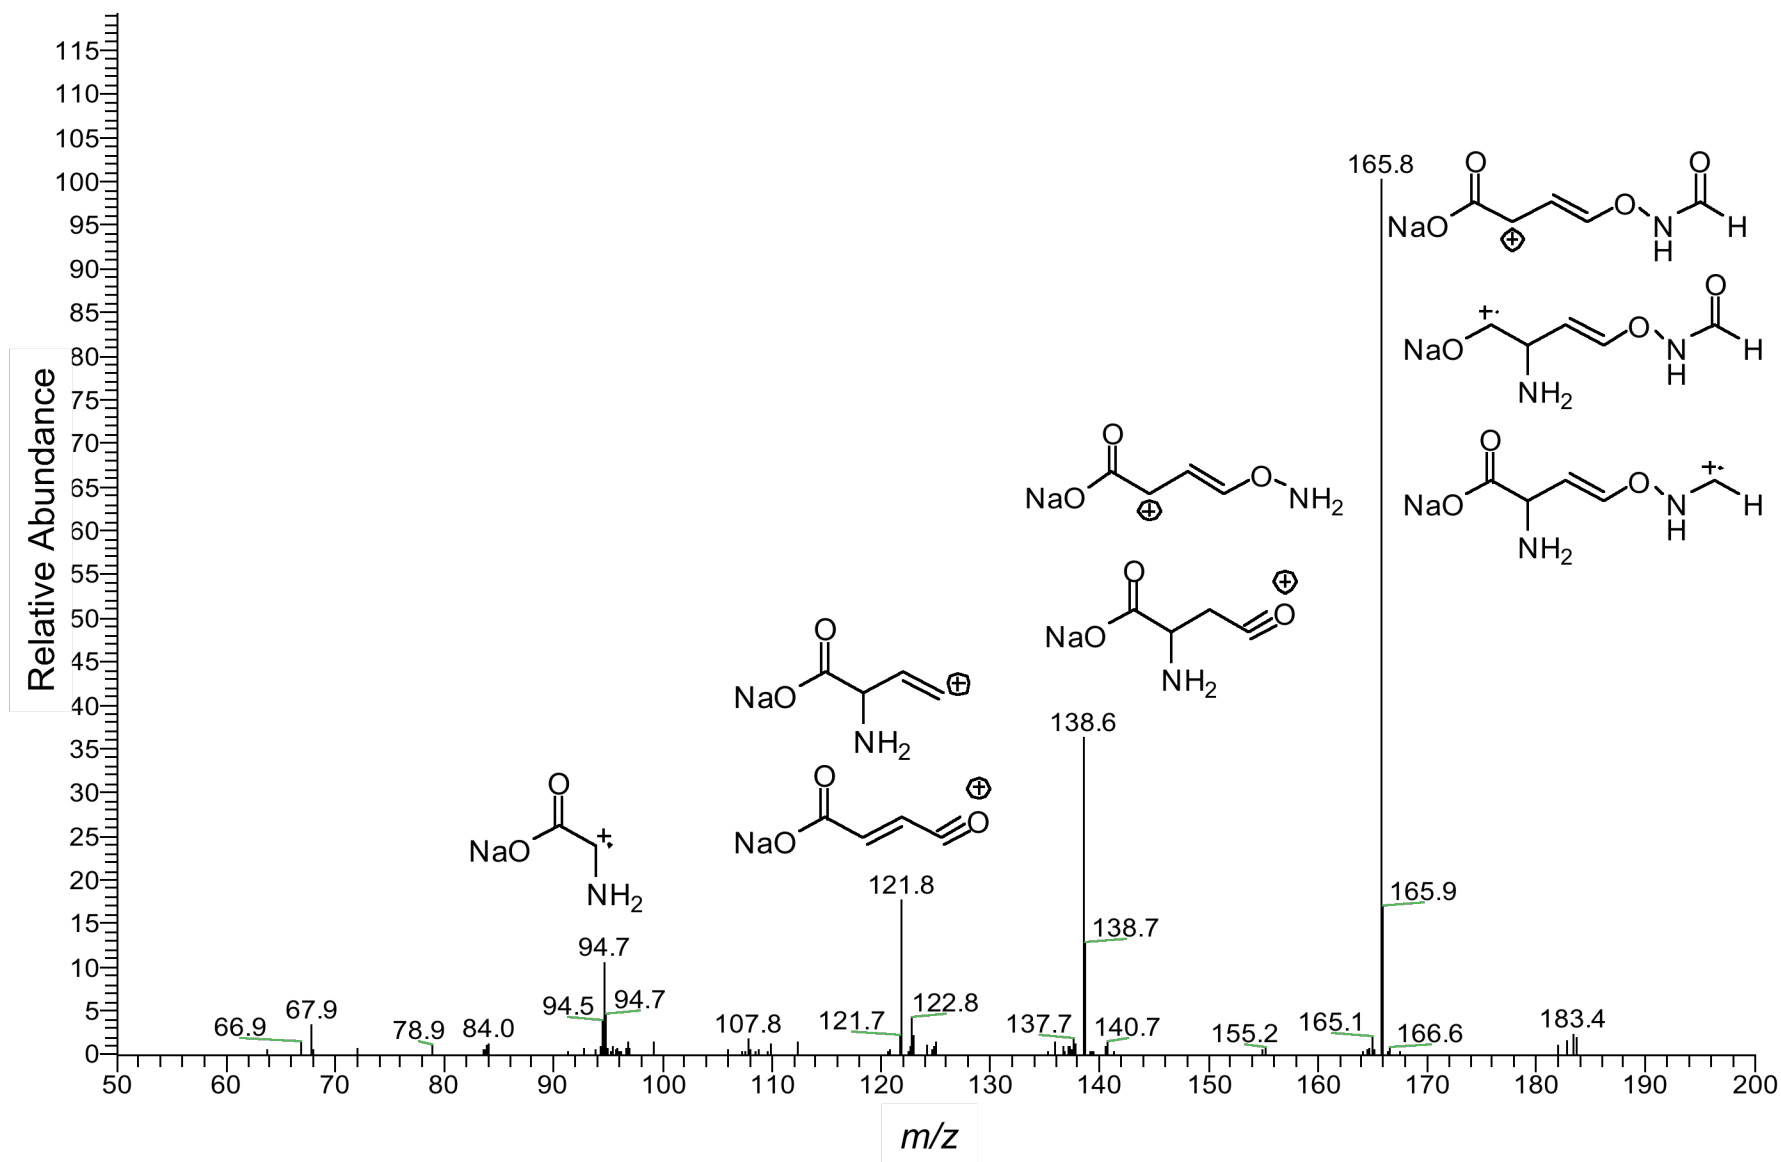

S12. Low resolution ESI-MS<sup>2</sup> of  $m/z$  183  $[M+Na]^+$  for 4-formylaminovinyglycine (GAF, **1**)

**Table. Taxonomy and Source of USDA-ARS NFSPRC Oregon *Pseudomonas fluorescens* Isolates.**

| Isolate      | NRRL Accession # | Site of Isolation                                 | Rhizosphere or otherwise stated Source of Isolate | <i>P. fluorescens</i> Taxonomy                              |                                  |
|--------------|------------------|---------------------------------------------------|---------------------------------------------------|-------------------------------------------------------------|----------------------------------|
|              |                  |                                                   |                                                   | Biotype from FAME Analysis (similarity index <sup>a</sup> ) | rDNA sequence match <sup>b</sup> |
| <b>A506</b>  | N/A              | Dr. Joyce Loper, USDA-ARS, OSU, Corvallis         | Leaf surfaces of <i>Pyrus</i>                     | A (0.845)                                                   | 100.0%                           |
| <b>D7</b>    | N/A              | Dr. Ann C. Kennedy, USDA-ARS, WSU, Pullman, WA    | <i>Setaria viridis</i>                            | B (0.836)                                                   | 100.0%                           |
| <b>Pf-5</b>  | N/A              | Dr. Joyce Loper, USDA-ARS, OSU, Corvallis         | <i>Bromus tectorum</i>                            | Source ID                                                   |                                  |
| <b>PfO-1</b> | N/A              | Dr. Stewart Levy, Tufts University, Medford, MA   | <i>Gossypium hirsutum</i>                         | Source ID                                                   |                                  |
| <b>WH6</b>   | B-30485          | Hyslop Research Farm, OSU, Benton Co.             | <i>Triticum</i> (wheat)                           | G (0.888)                                                   | 99.76%                           |
| <b>WH19</b>  | B-30484          | Hyslop Research Farm, OSU, Benton Co.             | <i>Triticum</i> (wheat)                           | A (0.891)                                                   | 99.77%                           |
| <b>E34</b>   | B-30481          | Hyslop Research Farm, OSU, Benton Co.             | Mixed <i>Poa</i> species                          | G (0.885)                                                   | 99.76%                           |
| <b>AH4</b>   | B-30482          | Disturbed Site, Alsea Valley, Benton Co.          | Healthy <i>Poa</i> species                        | A (0.929)                                                   | 100.0%                           |
| <b>AD31</b>  | B-30483          | Cut Bank, Alsea Valley, Benton County             | Dying <i>Poa</i> species                          | B (0.887)                                                   | 99.68%                           |
| <b>AH10</b>  | B-50232          | Disturbed Site, Alsea Valley, Benton Co.          | Healthy <i>Poa</i> species                        | G (0.918)                                                   | 100.0%                           |
| <b>BT1</b>   | B-50230          | Dept Botany & Plant Pathology Farm, OSU, Linn Co. | <i>Triticum</i> (wheat)                           | A (0.891)                                                   | 99.76%                           |
| <b>E24</b>   | B-50229          | Hyslop Research Farm, OSU, Benton Co.             | Mixed <i>Poa</i> species                          | B (0.807)                                                   | 100.0%                           |
| <b>TDH5</b>  | N/A              | Organic Vegetable Farm, Corvallis, Benton Co.     | Healthy <i>Poa</i> species                        | B (0.849)                                                   | 99.99%                           |

|               |         |                                                     |                                         |           |        |
|---------------|---------|-----------------------------------------------------|-----------------------------------------|-----------|--------|
| <b>TR33</b>   | B-50220 | Dept Botany and Plant Pathology Farm, OSU, Linn Co. | <i>Triticale</i>                        | A (0.912) | 99.76% |
| <b>TR44</b>   | B-50219 | Dept Botany and Plant Pathology Farm, OSU, Linn Co. | <i>Triticale</i>                        | A (0.913) | 99.74% |
| <b>TR46</b>   | B-50218 | Dept Botany and Plant Pathology Farm, OSU, Linn Co. | <i>Triticale</i>                        | G (0.940) | 99.75% |
| <b>ALW38</b>  | B-50231 | Lawn, Alsea Valley, Benton Co.                      | <i>Poa species</i>                      | G (0.915) | 99.79% |
| <b>G2Y</b>    | B-50228 | Grower's Field, Linn Co.                            | <i>Lolium perenne</i>                   | B (0.867) | 99.79% |
| <b>GTR12</b>  | B-50227 | Organic Vegetable Farm, Philomath, Benton Co.       | Grassy weeds, compost pile edge         | B (0.890) | 99.78% |
| <b>GTR24</b>  | B-50226 | Organic Vegetable Farm, Philomath, Benton Co.       | Grassy weeds, compost pile edge         | B (0.872) | 99.78% |
| <b>A17</b>    | N/A     | Disturbed Site, Alsea Valley, Benton Co.            | <i>Poa species</i>                      | B (0.745) | 100.0% |
| <b>GTR40</b>  | B-50223 | Organic Vegetable Farm, Philomath, Benton Co.       | Grassy weeds, compost pile edge         | G (0.910) | 99.77% |
| <b>HB14</b>   | B-50224 | Lawn, Alsea Valley, Benton Co.                      | <i>Poa species</i>                      | B (0.868) | 99.78% |
| <b>HB26</b>   | B-50223 | Lawn, Alsea Valley, Benton Co.                      | <i>Poa species</i>                      | B (0.884) | 99.78% |
| <b>HB32</b>   | B-50222 | Lawn, Alsea Valley, Benton Co.                      | <i>Poa species</i>                      | B (0.867) | 99.78% |
| <b>ST22</b>   | B-50221 | Hyslop Research Farm, OSU, Benton Co.               | <i>Hordeum vulgare</i>                  | G (0.953) | 99.78% |
| <b>W36</b>    | B-50217 | Hyslop Research Farm, OSU, Benton Co.               | <i>Triticum</i> with <i>Poa</i> species | G (0.892) | 99.77% |
| <b>A3422A</b> | B-50234 | Disturbed site, Alsea Valley, Benton Co.            | Unknown                                 | B (0.901) | 99.79% |
| <b>AH7</b>    | N/A     | Disturbed site, Alsea Valley, Benton Co.            | <i>Poa species</i>                      | B (0.745) | 100%   |

<sup>a</sup> Microcheck Database similarity index of 1.00 = perfect match; <sup>b</sup> 16S and LSU D2 % gene sequence match (Microcheck Database)



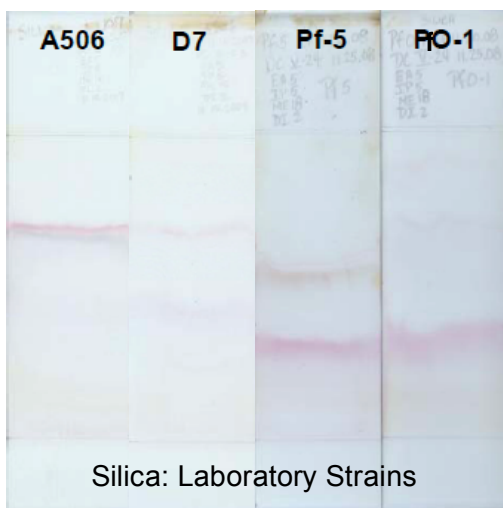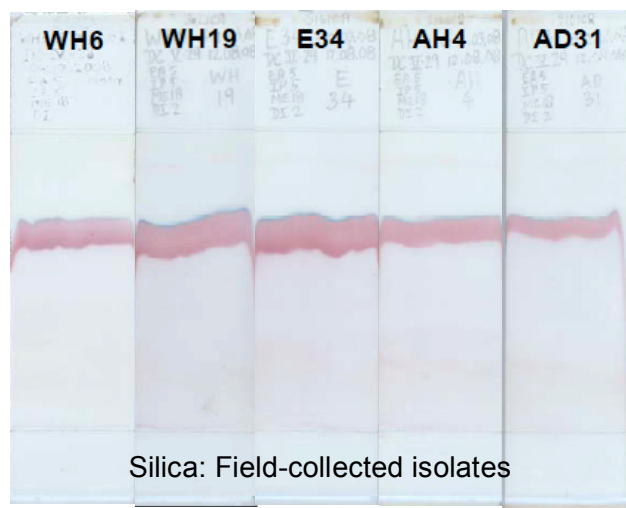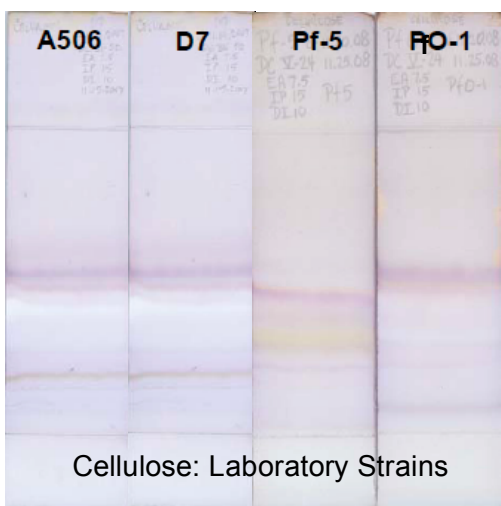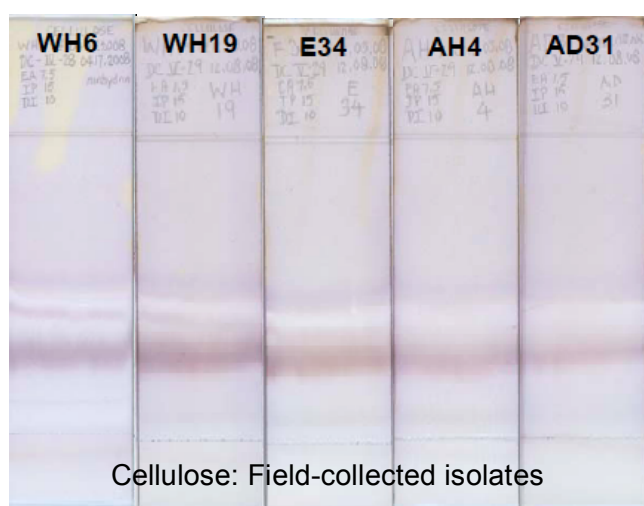

Silica (EtOAc-<sup>i</sup>PrOH-H<sub>2</sub>O 3:6:4) and cellulose (EtOAc-<sup>i</sup>PrOH-MeOH-H<sub>2</sub>O 5:5:18:2) TLC plates for four laboratory strains and the original five field-collected isolates of *P. fluorescens*.

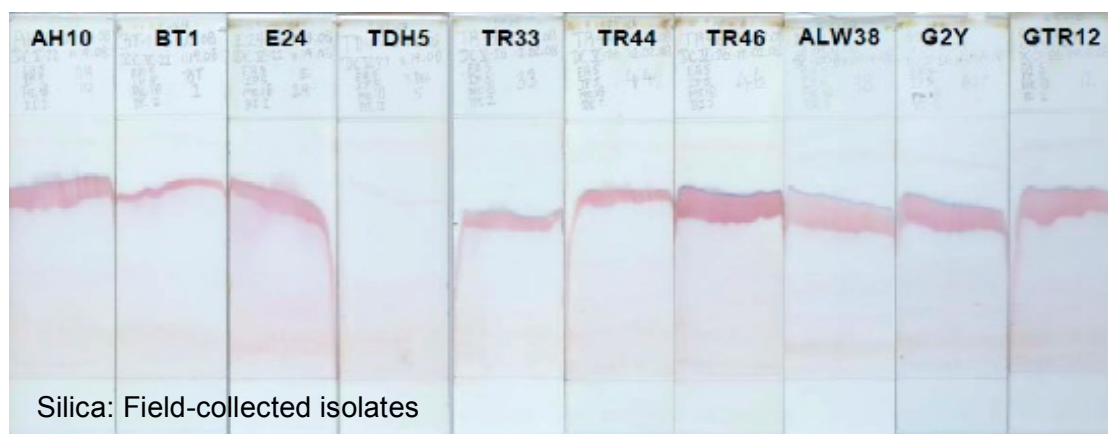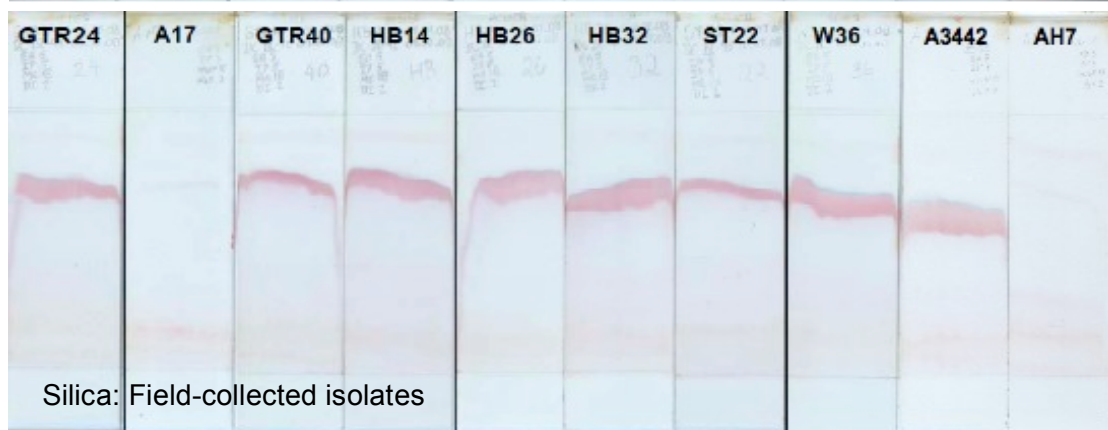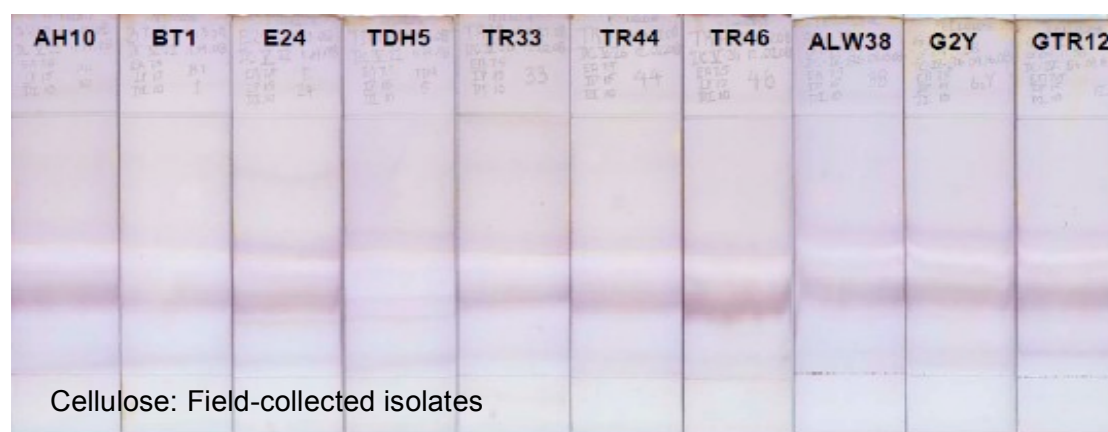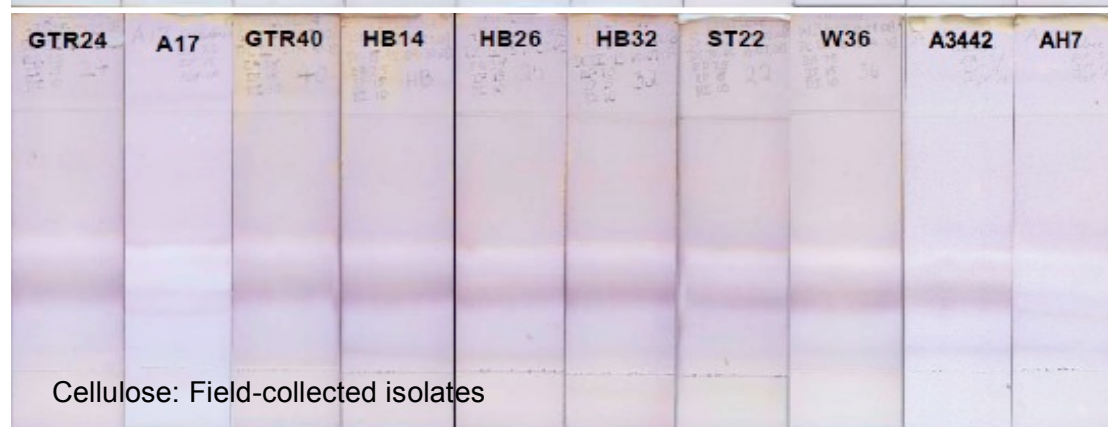

Silica and cellulose TLC plates for twenty additional field-collected *P. fluorescens* isolates.

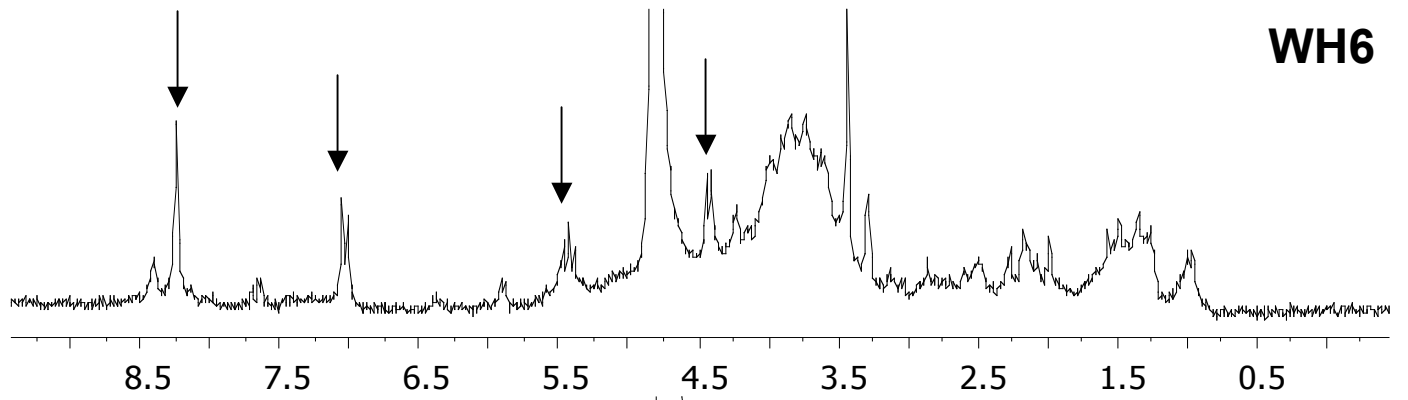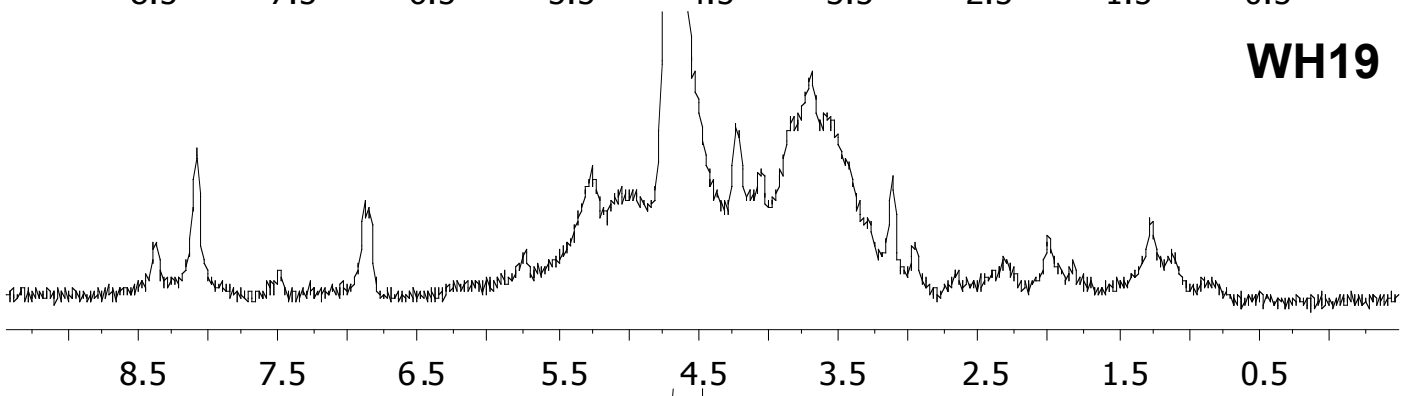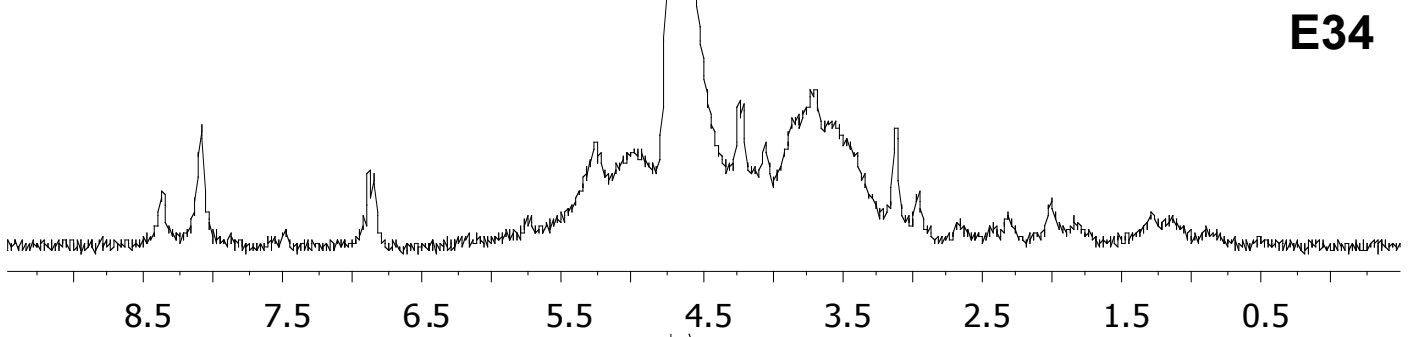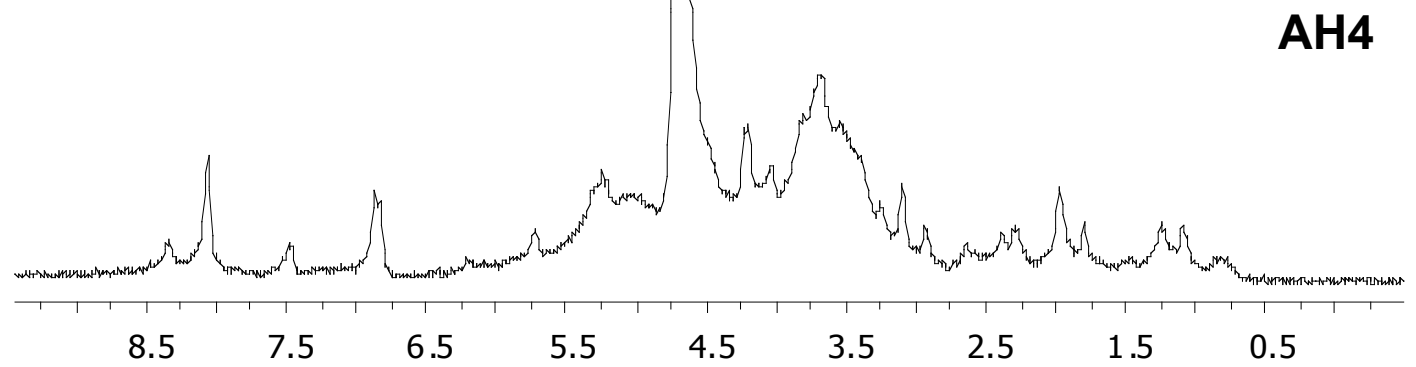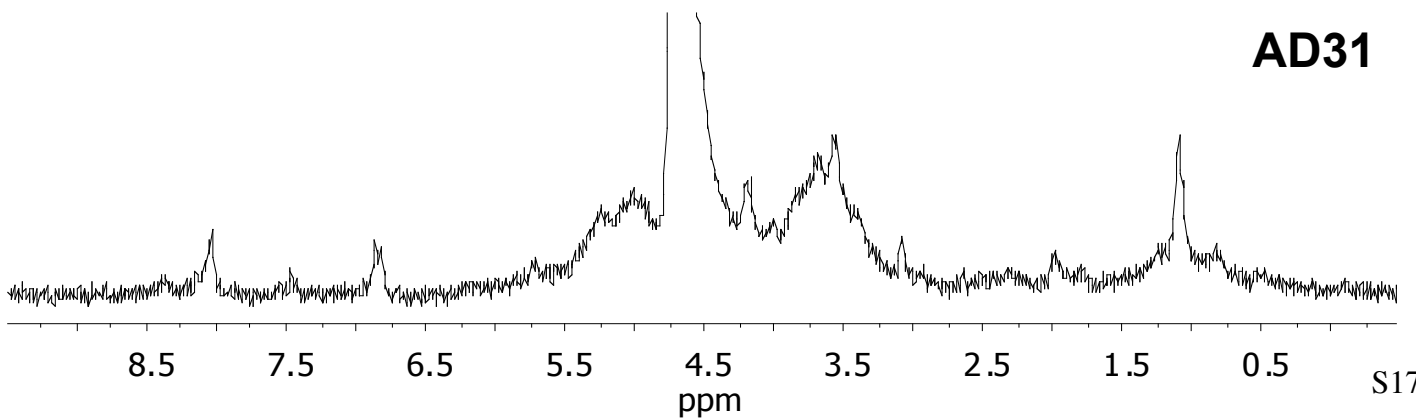

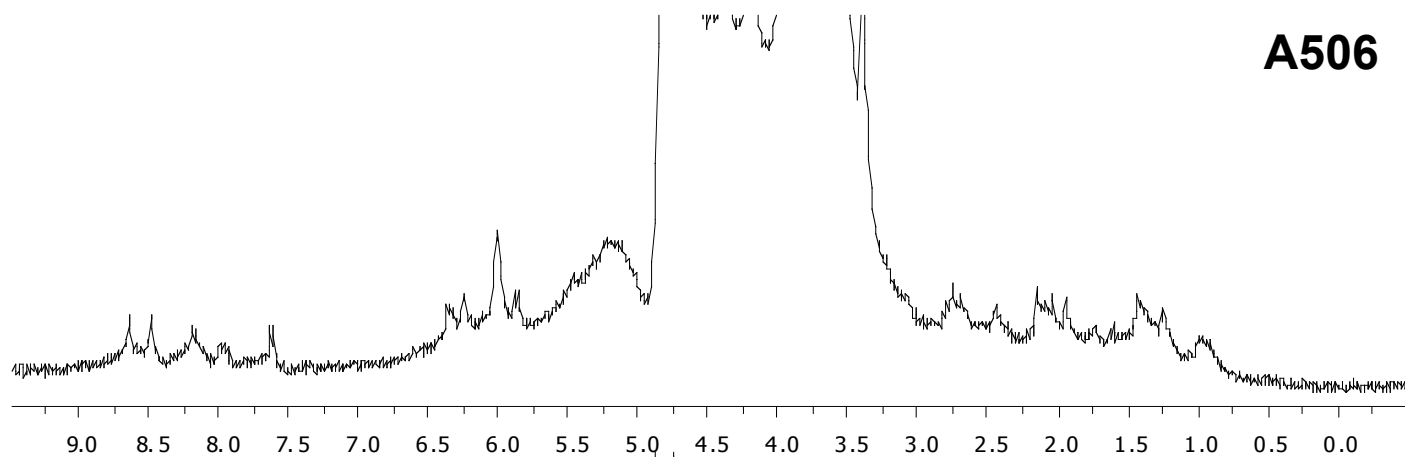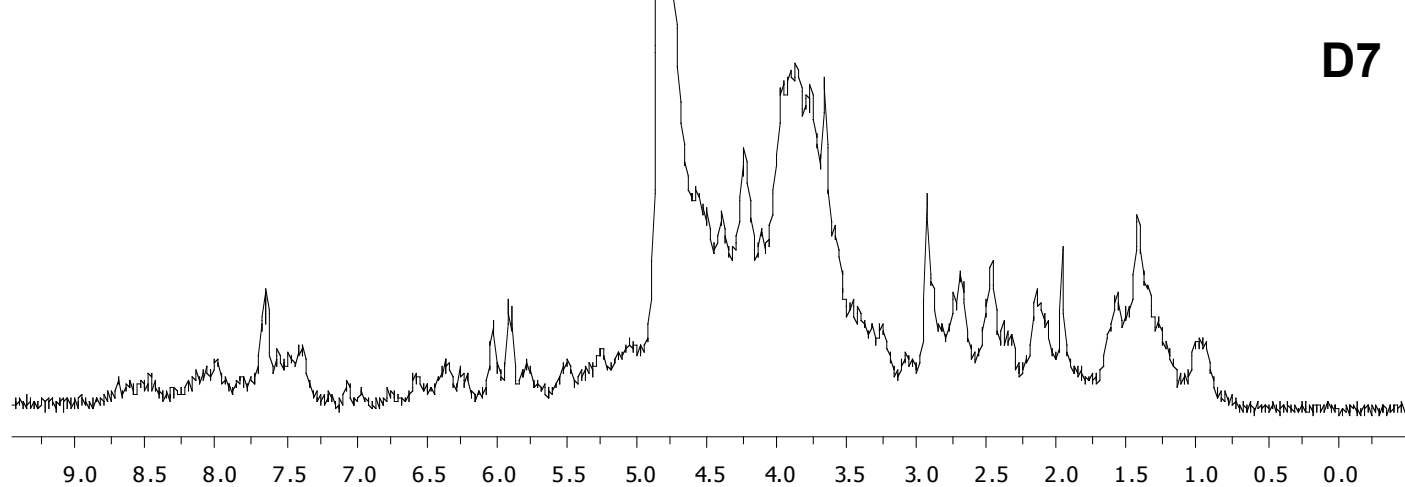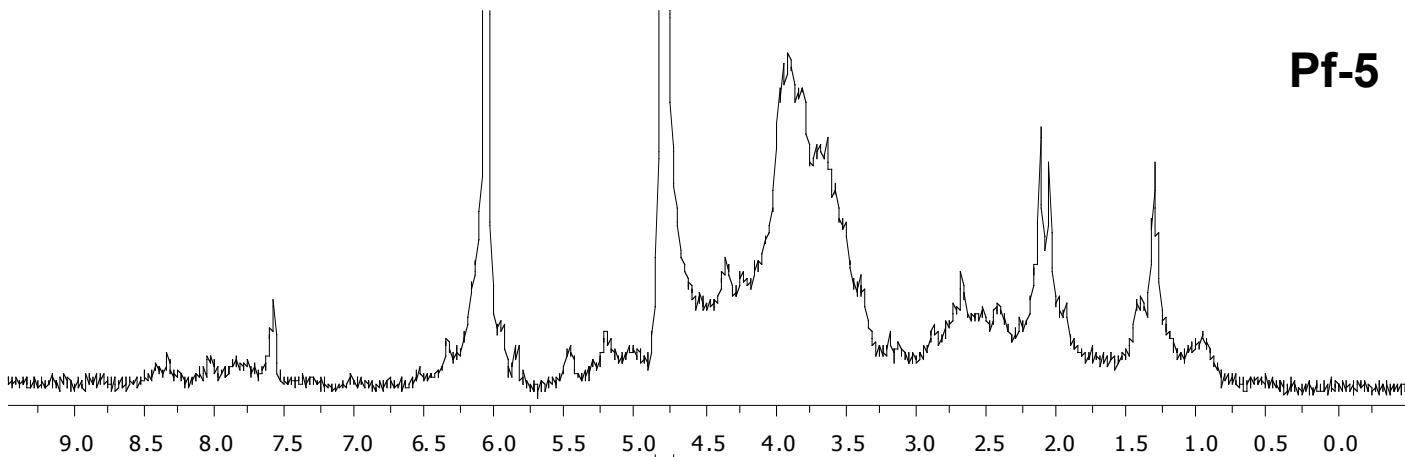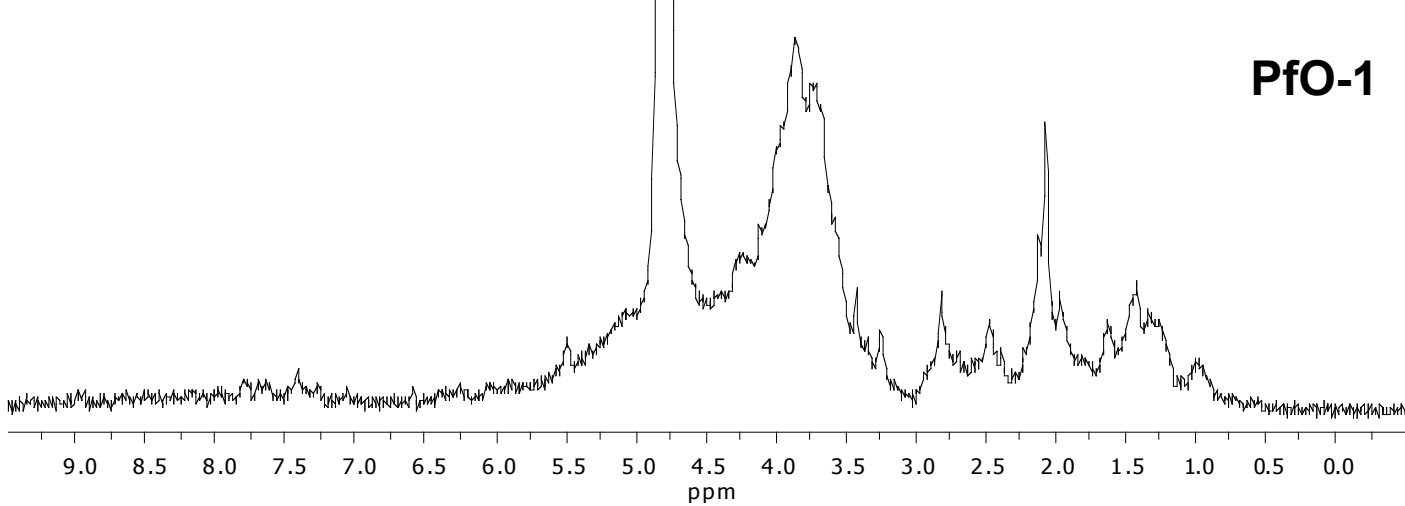

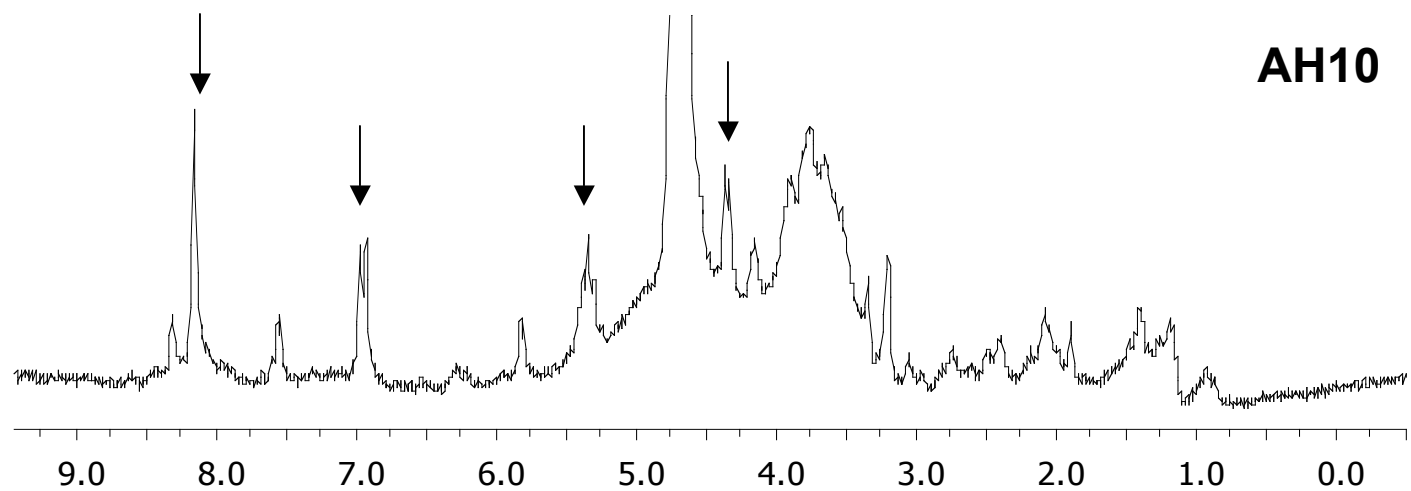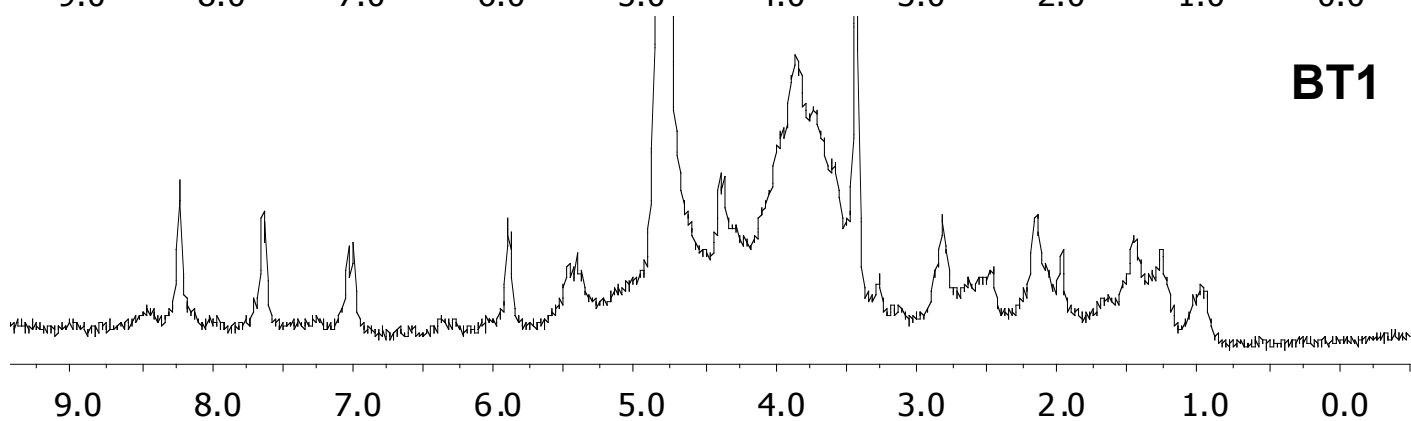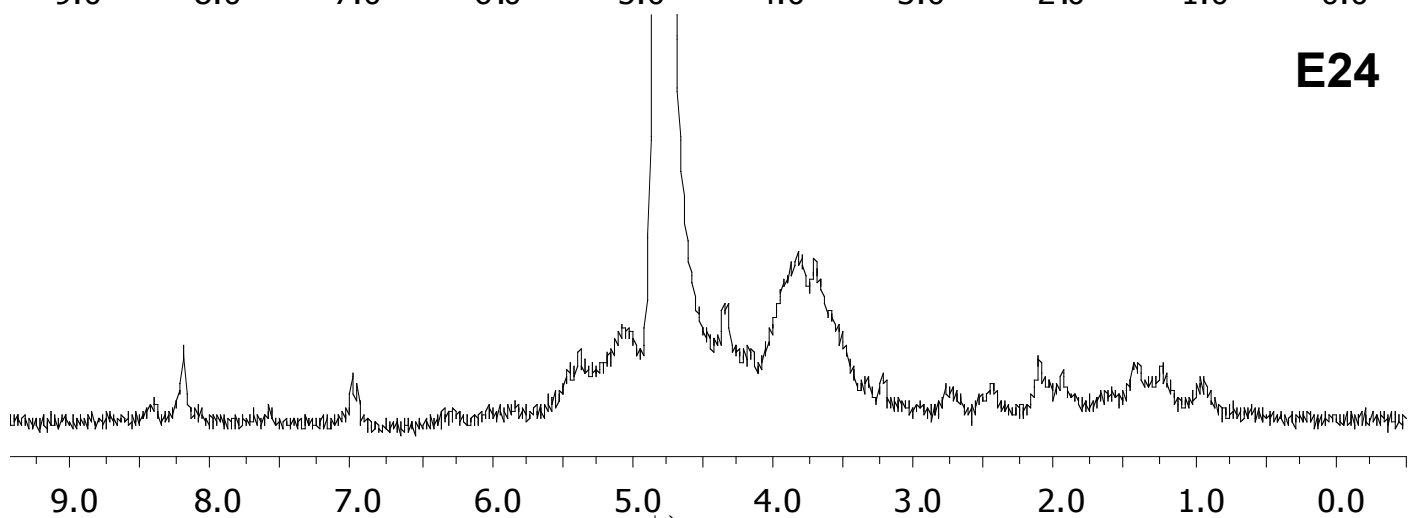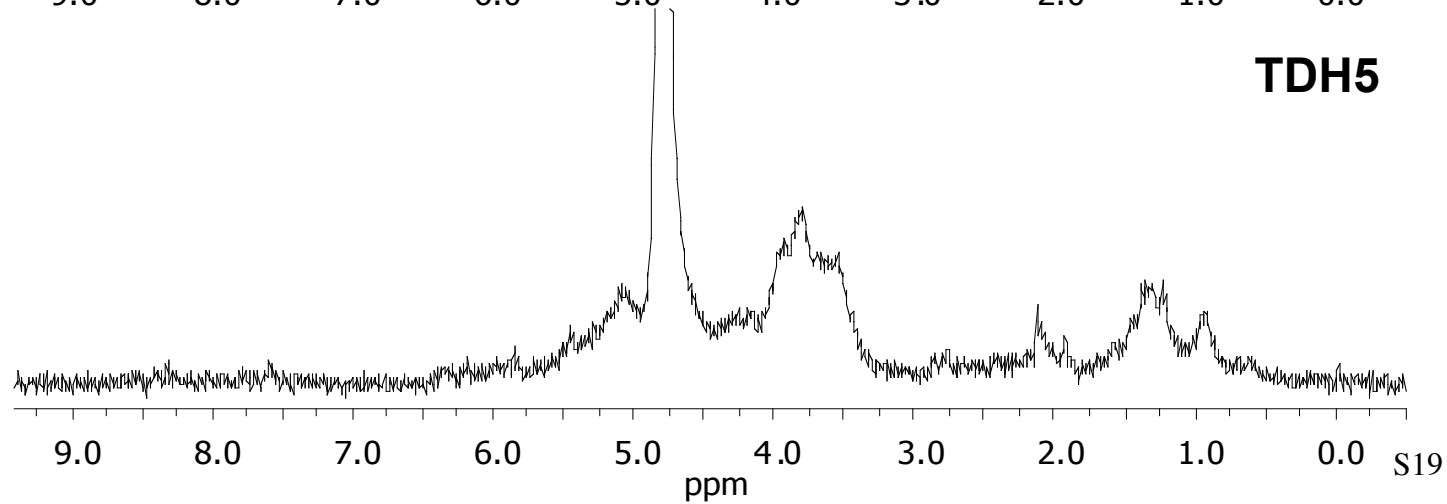

**TR33**

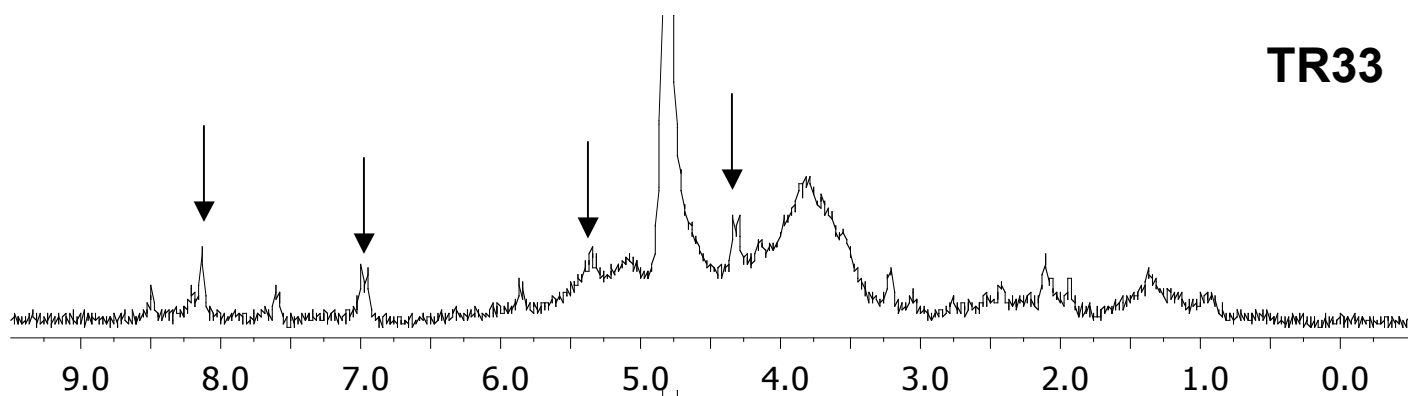

**TR44**

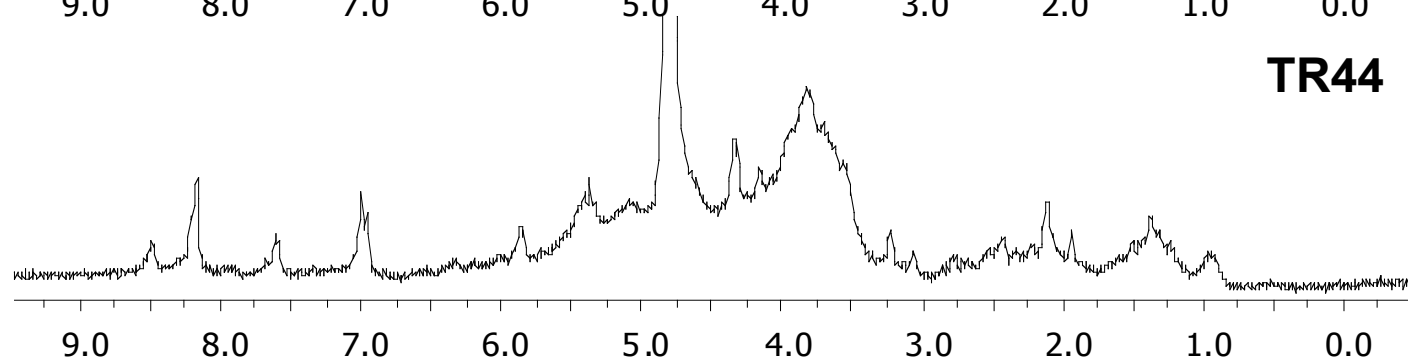

**TR46**

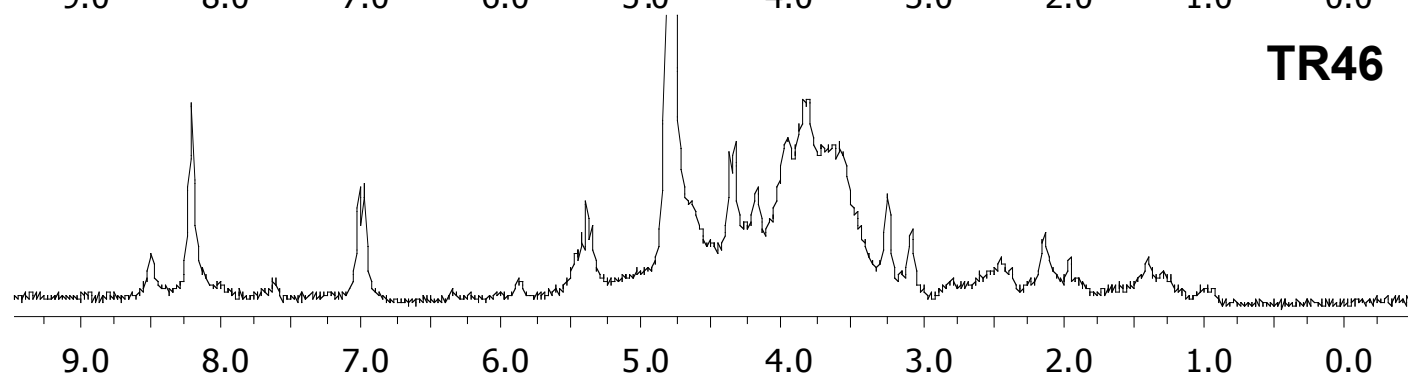

**ALW38**

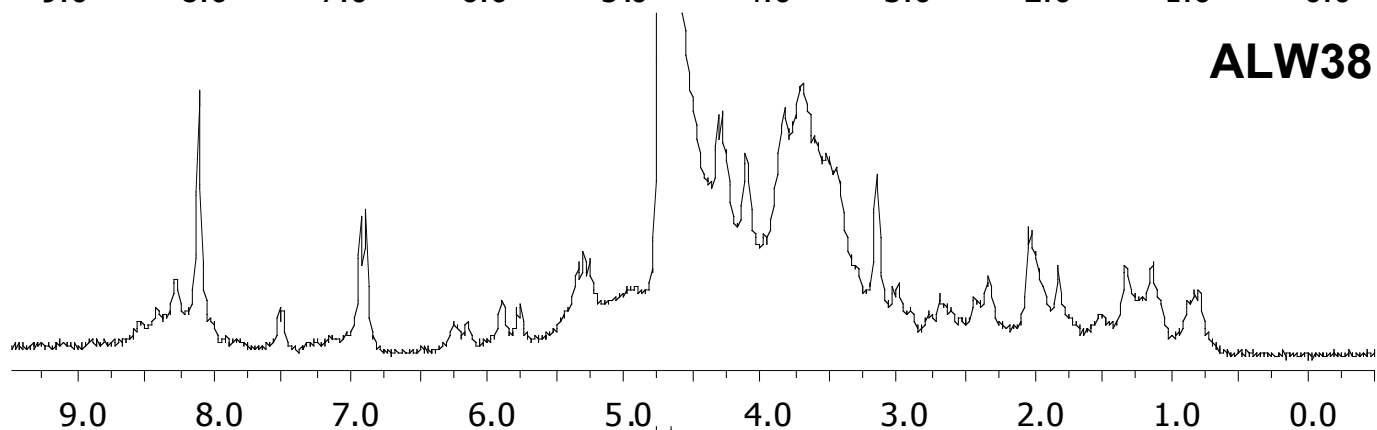

**G2Y**

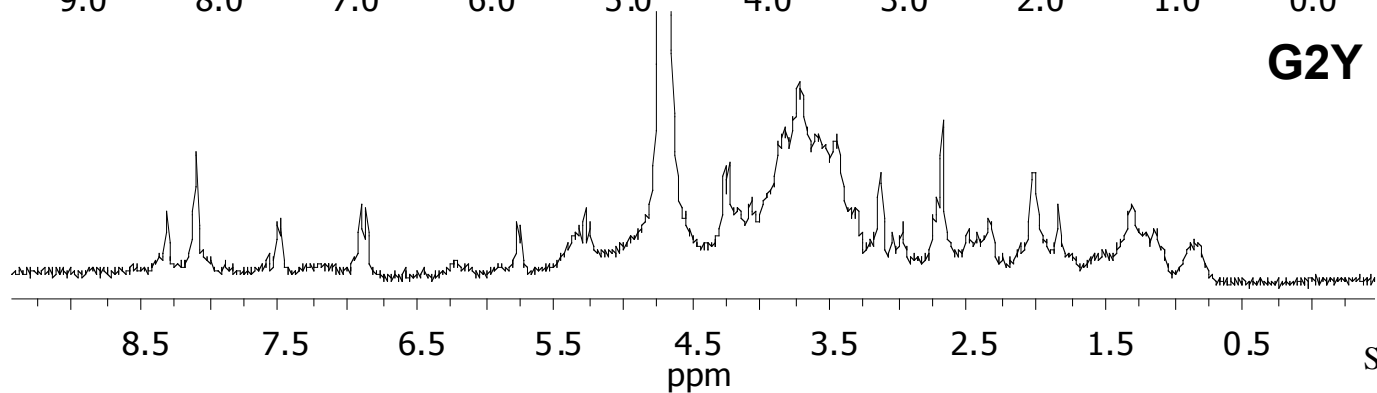

**GTR12**

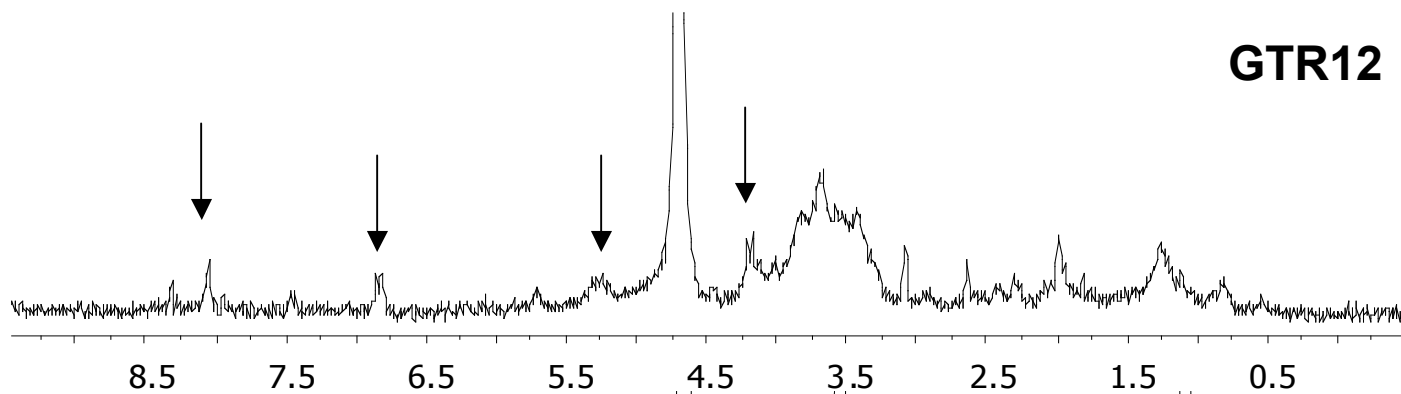

**GTR24**

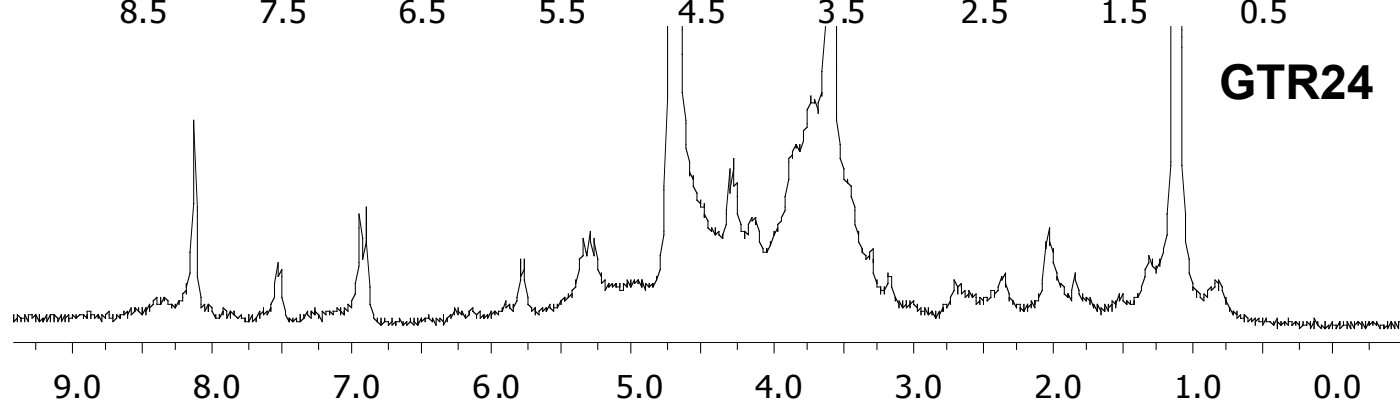

**AI7**

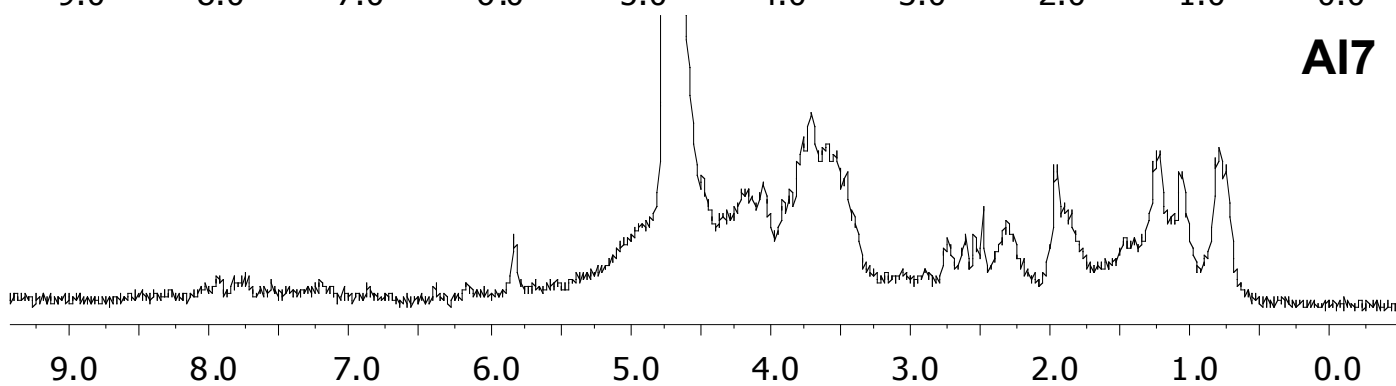

**GTR40**

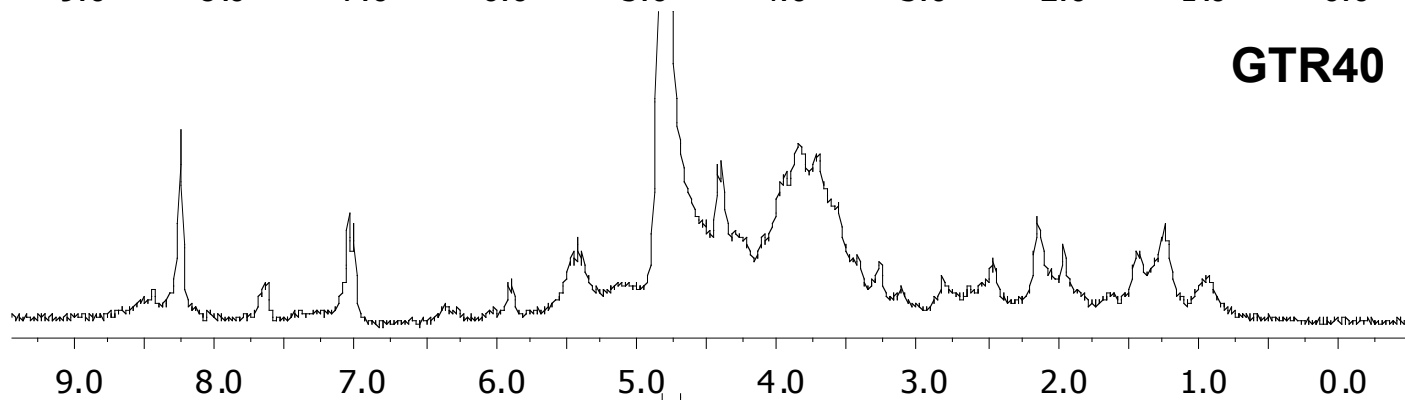

**HB14**

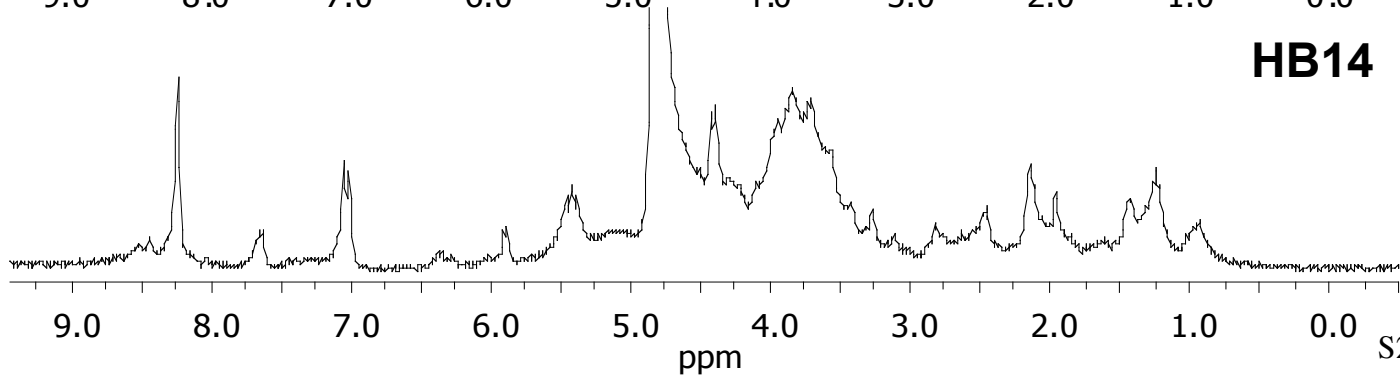

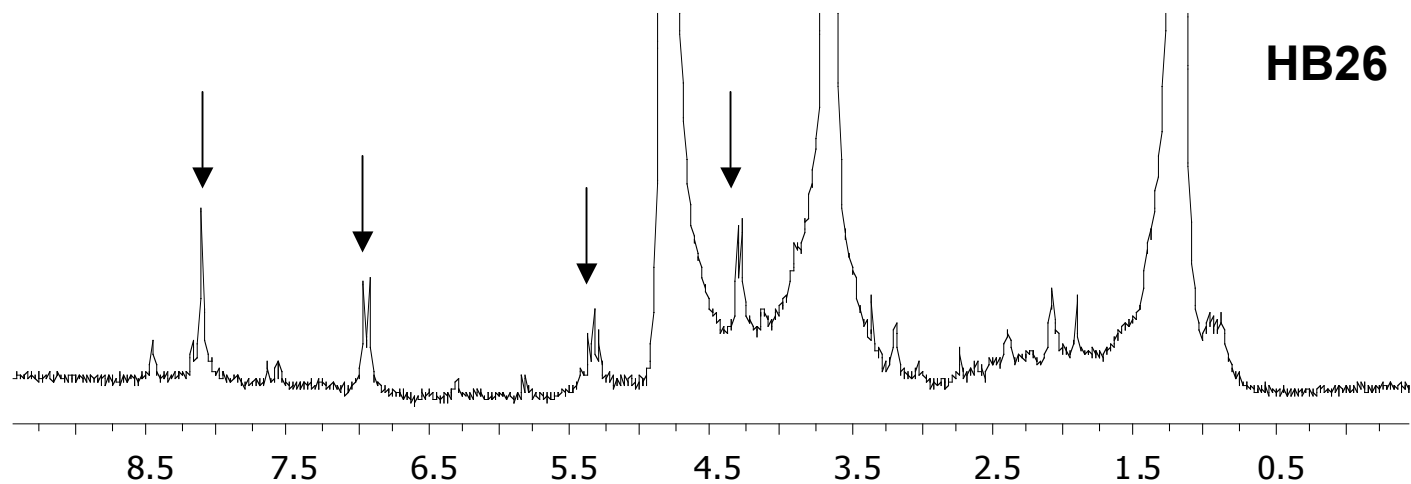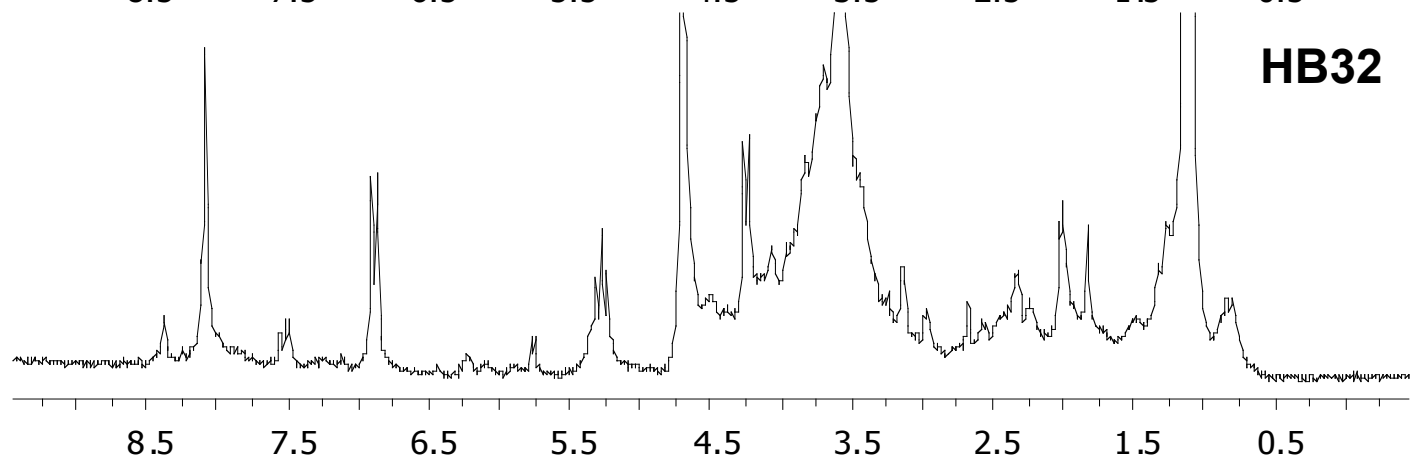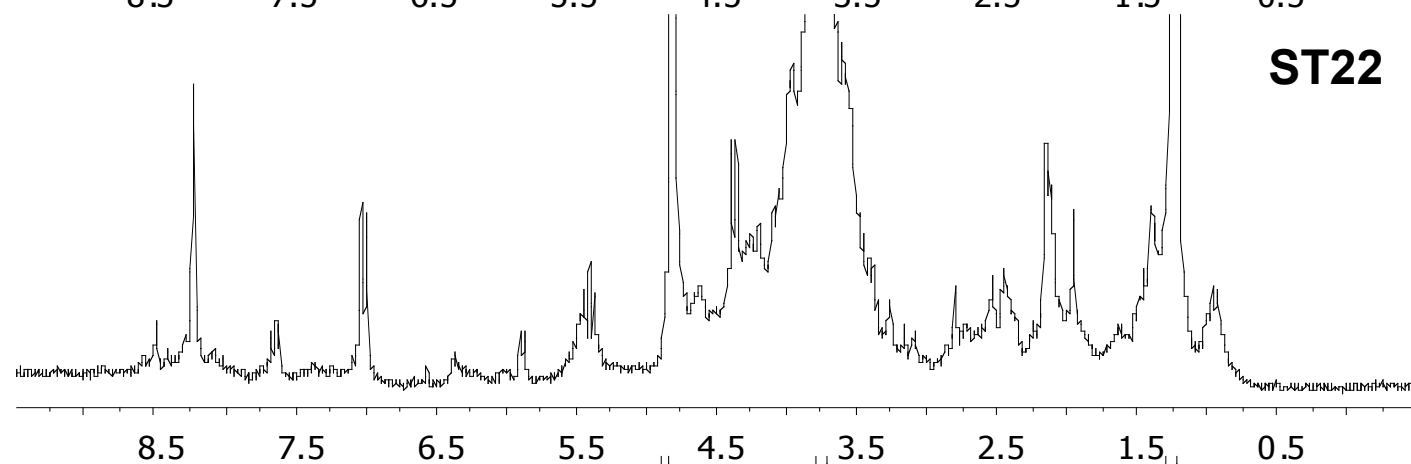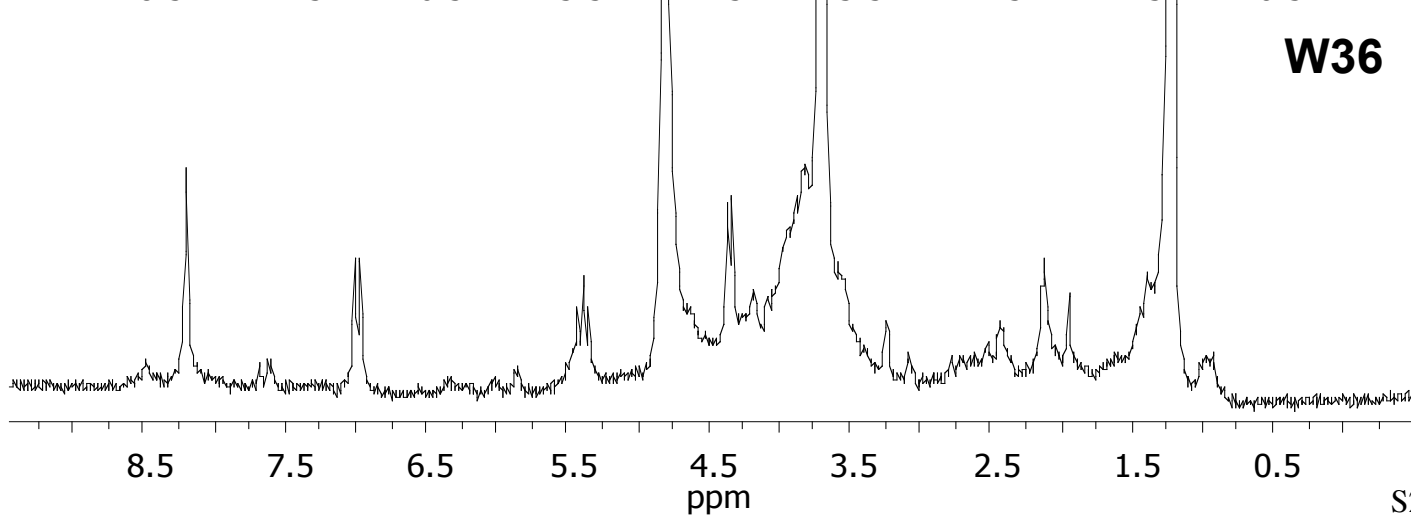



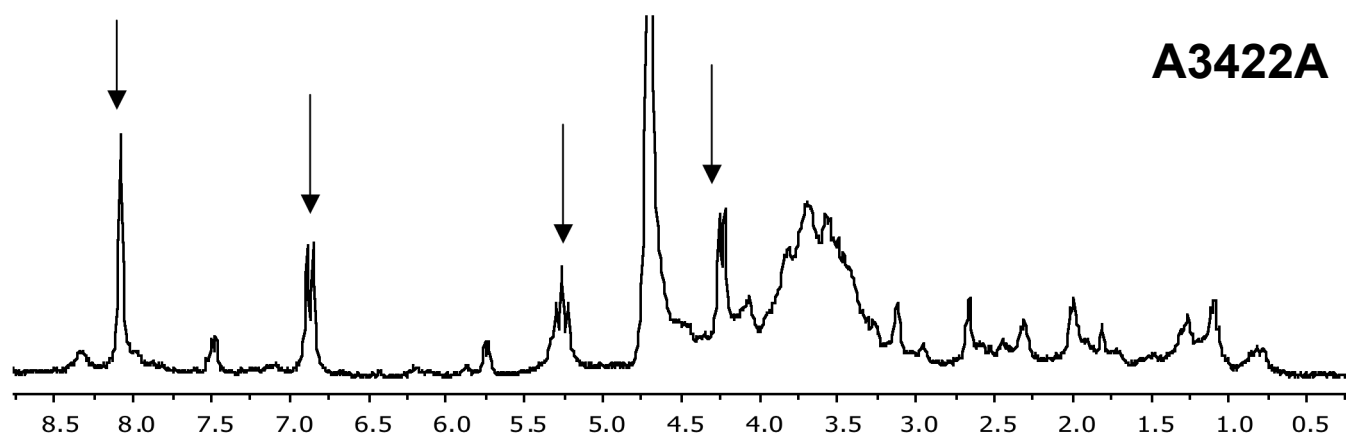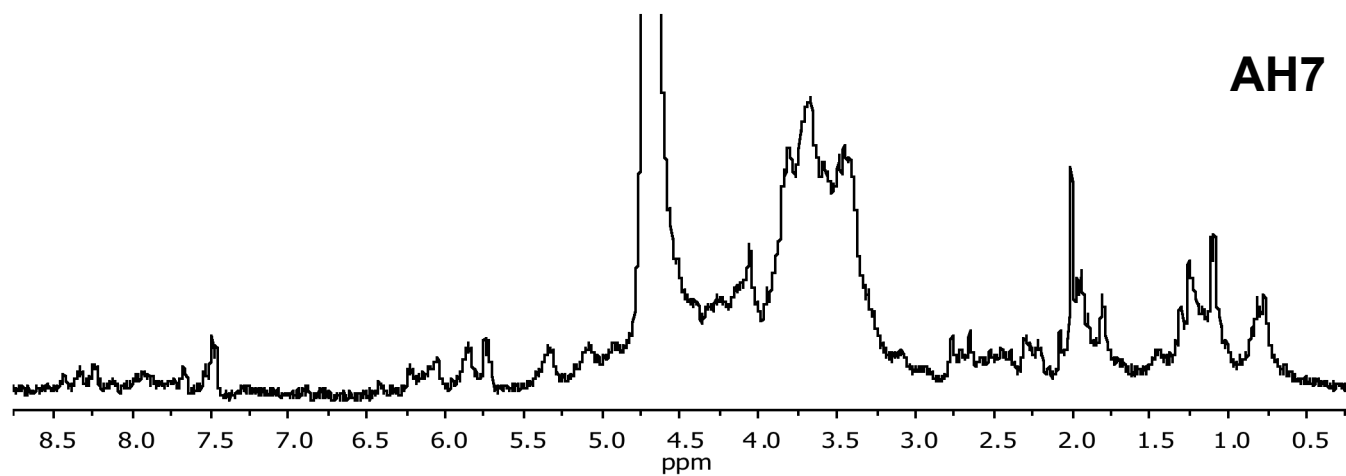

Supplement: Supplementary file 1 [file 4385542]
